# Supplementary material for: Genomics of Ovarian Cancer Progression Reveals Diverse Metastatic Trajectories Including Intraepithelial Metastasis to the Fallopian Tube
Source: Oxford University Press journal article supplement (doi:10.1158/2159-8290.cd-16-0607), 2016-10-07
Supplement: 21598290cd160607-sup-167162_2_supp_3684200_ll8d9n.xlsx [file 21598290cd160607-sup-167162_2_supp_3684200_ll8d9n.xlsx]

## Sheet: Sheet1
Patient	Diagnosis	FIGO Stage	LN	STIC	Cytology	Dx Age	Neo-adjuvant	BRCA1/2 mut	CA125	Chemotherapy	Platinum sensitivity	Anatomic Sites Involved	Bilateral	PFS	OS	Status
442	HGSOC	IIIC	N1	Yes	Yes	48	No	No	1212	Carboplatin+Paclitaxel	Intermediate	bilateral fimbriae, ovaries, omentum, diaphragm, falciform ligament, peritoneum, appendix	Yes	445	1129	DoD
451	HGSOC	IIIC	NX	Yes	N/A	59	No	No	N/A	Carboplatin+Paclitaxel	Sensitive	fimbriae, ovaries, omentum, peritoneum, mesentery	Yes	798	1723	DoD
505	HGSOC	IIIC	N0	Yes	Yes	75	No	No	6884	Carboplatin+Paclitaxel	Sensitive	fimbriae, ovaries, omentum, diaphragm, falciform ligament, peritoneum, appendix	Yes	599	2790	AwD
530	HGSOC	IV	Nx	Yes	Yes	53	No	No	868	Carboplatin+Paclitaxel	Resistant	fimbriae, ovaries, omentum, diaphragm, falciform ligament, peritoneum, appendix	Yes	321	1187	DoD
539	HGSOC	IIIC	N1	Yes	N/A	54	No	No	423	Carboplatin+Paclitaxel	Resistant	fimbriae, ovaries, omentum, diaphragm, falciform ligament, umbilicus	Yes	155	485	DoD
559	HGSOC	IIIC	NX	Yes	Yes	71	No	No	271	Carboplatin+Paclitaxel	Resistant	fimbriae, ovaries, omentum, diaphragm, peritoneum	Yes	346	557	DoD
563	HGSOC	IIIC	NX	Yes	N/A	60	No	No	335	Carboplatin+Paclitaxel	Resistant	fimbriae, ovaries, omentum, diaphragm, peritoneum	Yes	335	1118	DoD
754	HGSOC	IIIC	N0	Yes	Yes	45	No	No	1748	Carboplatin+Paclitaxel	Intermediate	fimbriae, ovaries, omentum, diaphragm, peritoneum	Yes	551	581	DoD
HGSOC: high grade serous ovarian cancer
FIGO: International Federation of Gynecologic and Obstetrics
LN: Lymph node involvement status
Dx Age: diagnosis age
BRCA mut: germline BRCA1 or BRCA2 mutation status
CA125: pre-operative CA-125 level (U/ml)
Platinum: platinum resistance status (resistant = recurrence within 6 months; intermediate = recurrence between 6-12 months; sensitive = recurrence after 12 months)
PFS: Progression free survival, OS = Overall survival
DoD: Died of disease; AwD = Alive with disease
