# Supplementary material for: Genomics of Ovarian Cancer Progression Reveals Diverse Metastatic Trajectories Including Intraepithelial Metastasis to the Fallopian Tube
Source: Oxford University Press journal article supplement (doi:10.1158/2159-8290.cd-16-0607), 2016-10-07
Supplement: 21598290cd160607-sup-167162_2_supp_3684201_778d77.xlsx [file 21598290cd160607-sup-167162_2_supp_3684201_778d77.xlsx]

## Sheet: Sheet1
patient	s.type	code	MEAN_TARGET_COVERAGE	ZERO_CVG_TARGETS_PCT	PCT_TARGET_BASES_2X	PCT_TARGET_BASES_10X	PCT_TARGET_BASES_20X	PCT_TARGET_BASES_30X	PCT_TARGET_BASES_40X	PCT_TARGET_BASES_50X	PCT_TARGET_BASES_100X
559	tumor	Om	38.7759	0.018892	0.980554	0.935407	0.791693	0.600309	0.415329	0.267337	0.013108
559	tumor	STIC	50.8407	0.018232	0.98204	0.966367	0.897193	0.765175	0.602459	0.445603	0.051832
559	tumor	FT	39.2591	0.019404	0.979927	0.934136	0.790866	0.602701	0.422138	0.275912	0.01583
559	tumor	Ov	61.1154	0.018293	0.982034	0.963305	0.899676	0.795659	0.674512	0.552842	0.14018
559	germline	gDNA	48.9471	0.017564	0.982564	0.962147	0.887224	0.749207	0.585281	0.43022	0.037437
754	tumor	STIC	24.5008	0.019074	0.980589	0.899766	0.612033	0.305537	0.106338	0.026304	0.000341
754	tumor	FT	51.8185	0.018479	0.981907	0.961244	0.884793	0.760862	0.618327	0.476582	0.054382
754	tumor	Ov	69.5955	0.018328	0.982421	0.969266	0.922155	0.84272	0.745659	0.642113	0.205783
754	tumor	Om	67.5033	0.017924	0.982684	0.967102	0.911216	0.826534	0.728184	0.624009	0.188937
754	germline	gDNA	74.3038	0.017685	0.983012	0.974912	0.953071	0.905744	0.827068	0.724476	0.227346
451	tumor	STIC	29.9093	0.017915	0.982384	0.963761	0.78753	0.456675	0.192745	0.067335	0.000447
451	tumor	FT	33.7699	0.019152	0.980584	0.943745	0.782567	0.537337	0.315212	0.163453	0.002582
451	tumor	Ov	66.2865	0.018349	0.982034	0.96818	0.921104	0.837785	0.731808	0.618205	0.176765
451	tumor	Om	63.3104	0.018445	0.981858	0.964925	0.907345	0.813291	0.70018	0.583763	0.156712
451	germline	gDNA	38.3822	0.018584	0.981471	0.960511	0.86538	0.669	0.437651	0.243222	0.000466
563	tumor	Om	35.3831	0.019551	0.979644	0.935745	0.78239	0.568584	0.3661	0.206201	0.002981
563	tumor	STIC	62.4294	0.018193	0.982285	0.97336	0.938204	0.861073	0.746018	0.611506	0.114747
563	tumor	FT	62.1118	0.018766	0.981518	0.965244	0.912722	0.820787	0.705331	0.583279	0.138764
563	tumor	Ov	60.0023	0.018866	0.981311	0.963675	0.909255	0.814307	0.693705	0.565996	0.119415
563	germline	gDNA	47.2354	0.017976	0.982219	0.960367	0.87927	0.732647	0.563649	0.406485	0.028716
530	tumor	STIC	33.8545	0.019165	0.980449	0.935759	0.762611	0.524259	0.312126	0.16643	0.005923
530	tumor	FT	50.9147	0.018592	0.981842	0.966732	0.902673	0.777635	0.61696	0.453734	0.043751
530	tumor	Ov	35.4695	0.020159	0.978126	0.906701	0.712478	0.505178	0.339654	0.218971	0.016569
530	tumor	Om	40.5489	0.018406	0.98199	0.951879	0.819244	0.62255	0.429688	0.276979	0.020123
530	germline	gDNA	79.0333	0.017138	0.983602	0.977544	0.959039	0.91588	0.843401	0.749839	0.269992
442	tumor	STIC	42.8557	0.018006	0.982286	0.970127	0.899513	0.731877	0.511723	0.311664	0.011684
442	tumor	FT	45.7207	0.018002	0.982132	0.967125	0.893709	0.741981	0.551111	0.369372	0.023419
442	tumor	Ov	56.425	0.018375	0.981839	0.96323	0.900887	0.792737	0.661742	0.528686	0.08859
442	tumor	Om	55.308	0.018627	0.981506	0.962784	0.900437	0.790643	0.655833	0.518477	0.077904
442	germline	gDNA	77.1293	0.016917	0.983835	0.977448	0.959932	0.918663	0.846285	0.749147	0.252053
505	tumor	Om	53.0446	0.018675	0.980957	0.954407	0.872306	0.746707	0.604994	0.468871	0.080076
505	tumor	STIC	61.9788	0.018223	0.982179	0.967049	0.914192	0.819608	0.700038	0.574784	0.135305
505	tumor	FT	55.5692	0.01831	0.981	0.929869	0.817628	0.696149	0.577368	0.468972	0.132034
505	tumor	Ov	44.5079	0.018388	0.982007	0.955606	0.85067	0.690965	0.51677	0.357348	0.027431
505	germline	gDNA	48.4072	0.017763	0.982441	0.961235	0.883046	0.74175	0.576831	0.422018	0.035886
539	tumor	STIC	51.4168	0.018631	0.981499	0.950398	0.850219	0.707651	0.562058	0.431662	0.08235
539	tumor	FT	49.3812	0.018926	0.981158	0.951777	0.852097	0.708867	0.558746	0.421381	0.06075
539	tumor	Ov	51.0881	0.018848	0.981179	0.945484	0.841727	0.710665	0.573632	0.444025	0.075702
539	tumor	Om	65.3177	0.018171	0.982321	0.966001	0.9125	0.821183	0.70904	0.592041	0.167327
539	germline	gDNA	73.25	0.017208	0.983565	0.975783	0.953017	0.899945	0.812932	0.705349	0.218339
patient: patient identifier number
s.type: sample type (tumor or normal germline DNA)
code: anatomic location (STIC=serous tubal intraepithelial carcinoma; FT=invasive fallopian tube; Ov=invasive ovary; Om=metastatic omentum; gDNA=normal germline DNA)
MEAN_TARGET_COVERAGE
ZERO_CVG_TARGETS_PCT: proportion of exome not captured/sequenced
PCT_TARGET_BASES_X: proportion of the genome sequenced at the indicated depth
