# Supplementary material for: Genomics of Ovarian Cancer Progression Reveals Diverse Metastatic Trajectories Including Intraepithelial Metastasis to the Fallopian Tube
Source: Oxford University Press journal article supplement (doi:10.1158/2159-8290.cd-16-0607), 2016-10-07
Supplement: 21598290cd160607-sup-167162_2_supp_3684203_dd8dch.xlsx [file 21598290cd160607-sup-167162_2_supp_3684203_dd8dch.xlsx]

## Sheet: Sheet1
Patient	TP53 Mutation	TP53	COSMIC	VAF
		IHC		STIC	FT	OV	OM
442	M208fs	+++	N	0.8333	0.9	0.7188	0.8158
	(FS deletion)
451	Y88D	+++	Y	0.8333	0.931	0.8888	1
505	T7577610C (splice site)	-	Y	0.8889	0.8462	0.7436	0.8889
530	Y88C	+++	Y	0.7	0.8113	0.9412	0.7297
539	G113D	+++	Y	0.8125	0.9118	0.875	0.8966
559	H47Y	+++	Y	0.9722	1	1	0.9677
563	I119S	+++	Y	0.6667	0.8148	0.8276	1
754	E217X	+++	Y	0.7778	0.8529	0.9615	0.9643
	(stop gain)
TP53 IHC = Staining with anti-TP53 Ab-6 (pantropic) antibody.
COSMIC = Presence in Catalogue of Somatic Mutations in Cancer Database.
VAF = Variant (mutant) allele frequency at each anatomic site
STIC = serous tubal intraepithelial carcinoma; FT = invasive fallopian tube tumor; OV = ovarian tumor; OM = omental metastasis.
