# Supplementary material for: Genomics of Ovarian Cancer Progression Reveals Diverse Metastatic Trajectories Including Intraepithelial Metastasis to the Fallopian Tube
Source: Oxford University Press journal article supplement (doi:10.1158/2159-8290.cd-16-0607), 2016-10-07
Supplement: 21598290cd160607-sup-167162_2_supp_3684204_jj8dd6.xlsx [file 21598290cd160607-sup-167162_2_supp_3684204_jj8dd6.xlsx]

## Sheet: Sheet1
Patient	Site	Chrom	Arm	Start Pos	End Pos	No. of Probes	Mean
442	FT	1	p	65832	23637254	3549	-0.5775
442	FT	1	p	65832	23637254	3549	-0.5775
442	FT	1	p	65832	23637254	3549	-0.5775
442	FT	1	p	23637764	35135140	1689	-0.4214
442	FT	1	p	23637764	35135140	1689	-0.4214
442	FT	1	p	35183846	36521183	230	1.9285
442	FT	1	p	35183846	36521183	230	1.9285
442	FT	1	p	36550578	39815105	411	0.7263
442	FT	1	p	36550578	39815105	411	0.7263
442	FT	1	p	39816415	46860072	1237	1.3429
442	FT	1	p	39816415	46860072	1237	1.3429
442	FT	1	p	46867715	54871522	825	1.0268
442	FT	1	p	46867715	54871522	825	1.0268
442	FT	1	p	55013919	121310476	4348	0.3126
442	FT	1	p	55013919	121310476	4348	0.3126
442	FT	1	q	144013835	152060390	988	0.5022
442	FT	1	q	144013835	152060390	988	0.5022
442	FT	1	q	152079784	152382065	88	-1.0259
442	FT	1	q	152079784	152382065	88	-1.0259
442	FT	1	q	152382561	153431462	86	-0.2584
442	FT	1	q	152382561	153431462	86	-0.2584
442	FT	1	q	153507090	156309473	1038	0.4315
442	FT	1	q	153507090	156309473	1038	0.4315
442	FT	1	q	156314290	157545349	321	0.146
442	FT	1	q	156314290	157545349	321	0.146
442	FT	1	q	157548231	159683356	284	-0.4065
442	FT	1	q	157548231	159683356	284	-0.4065
442	FT	1	q	159684103	240655358	7046	0.2575
442	FT	1	q	159684103	240655358	7046	0.2575
442	FT	1	q	240656275	243384988	136	-0.2623
442	FT	1	q	240656275	243384988	136	-0.2623
442	FT	1	q	243388432	247729086	338	0.308
442	FT	1	q	243388432	247729086	338	0.308
442	FT	1	q	247737472	249106161	119	-0.707
442	FT	1	q	247737472	249106161	119	-0.707
442	FT	1	q	249107177	249211066	23	0.474
442	FT	1	q	249107177	249211066	23	0.474
442	FT	2	p	41460	9022604	304	-0.007
442	FT	2	p	41460	9022604	304	-0.007
442	FT	2	p	9028089	89185598	5776	0.3142
442	FT	2	p	9028089	89185598	5776	0.3142
442	FT	2	p	89196710	91960853	97	-0.2912
442	FT	2	p	89196710	91960853	97	-0.2912
442	FT	2	q	95537299	103374849	1059	0.2655
442	FT	2	q	95537299	103374849	1059	0.2655
442	FT	2	q	103374972	170382085	3447	-0.1076
442	FT	2	q	103374972	170382085	3447	-0.1076
442	FT	2	q	170386263	179368398	794	0.1196
442	FT	2	q	170386263	179368398	794	0.1196
442	FT	2	q	179391769	179647030	269	-0.8112
442	FT	2	q	179391769	179647030	269	-0.8112
442	FT	2	q	179647573	204334916	1777	0.0461
442	FT	2	q	179647573	204334916	1777	0.0461
442	FT	2	q	204341755	243037046	3732	-0.1491
442	FT	2	q	204341755	243037046	3732	-0.1491
442	FT	3	p	239351	90283547	6445	0.1657
442	FT	3	p	239351	90283547	6445	0.1657
442	FT	3	q	93593119	130383839	2705	0.2372
442	FT	3	q	93593119	130383839	2705	0.2372
442	FT	3	q	130394093	197765390	4293	0.3917
442	FT	3	q	130394093	197765390	4293	0.3917
442	FT	4	p	53239	10600235	1262	0.0373
442	FT	4	p	53239	10600235	1262	0.0373
442	FT	4	p	10669386	22694605	420	0.3608
442	FT	4	p	10669386	22694605	420	0.3608
442	FT	4	p	22715680	49063825	1117	-0.539
442	FT	4	p	22715680	49063825	1117	-0.539
442	FT	4	q	52709329	78665953	1432	-0.5439
442	FT	4	q	52709329	78665953	1432	-0.5439
442	FT	4	q	78669362	80246320	156	0.3599
442	FT	4	q	78669362	80246320	156	0.3599
442	FT	4	q	80246516	190947898	4753	-0.504
442	FT	4	q	80246516	190947898	4753	-0.504
442	FT	5	p	140385	26988206	1005	-0.4035
442	FT	5	p	140385	26988206	1005	-0.4035
442	FT	5	p	31267570	45696008	1093	-0.1518
442	FT	5	p	31267570	45696008	1093	-0.1518
442	FT	5	q	49695036	140165857	4873	0.0014
442	FT	5	q	49695036	140165857	4873	0.0014
442	FT	5	q	140166220	140884960	309	-0.6358
442	FT	5	q	140166220	140884960	309	-0.6358
442	FT	5	q	140890422	180687068	3106	-0.1409
442	FT	5	q	140890422	180687068	3106	-0.1409
442	FT	6	p	203389	36590220	2330	0.5547
442	FT	6	p	203389	36590220	2330	0.5547
442	FT	6	p	36645511	47626664	1455	-0.0328
442	FT	6	p	36645511	47626664	1455	-0.0328
442	FT	6	p	47641147	58287628	675	-0.2831
442	FT	6	p	47641147	58287628	675	-0.2831
442	FT	6	q	62390794	74073299	371	-0.4273
442	FT	6	q	62390794	74073299	371	-0.4273
442	FT	6	q	74078424	170893399	5441	-0.0612
442	FT	6	q	74078424	170893399	5441	-0.0612
442	FT	7	p	193221	5021624	558	0.0427
442	FT	7	p	193221	5021624	558	0.0427
442	FT	7	p	5021723	30868164	1631	0.306
442	FT	7	p	5021723	30868164	1631	0.306
442	FT	7	p	30876178	32338178	106	-0.3535
442	FT	7	p	30876178	32338178	106	-0.3535
442	FT	7	p	32526834	57529548	1470	0.1878
442	FT	7	p	32526834	57529548	1470	0.1878
442	FT	7	q	62758725	100624657	2911	0.2616
442	FT	7	q	62758725	100624657	2911	0.2616
442	FT	7	q	100633823	100685892	58	-1.0278
442	FT	7	q	100633823	100685892	58	-1.0278
442	FT	7	q	100691170	159025864	4612	0.171
442	FT	7	q	100691170	159025864	4612	0.171
442	FT	8	p	182714	3165184	196	-0.5967
442	FT	8	p	182714	3165184	196	-0.5967
442	FT	8	p	3165869	43211930	2686	-0.1578
442	FT	8	p	3165869	43211930	2686	-0.1578
442	FT	8	q	47752736	59412572	476	-0.22
442	FT	8	q	47752736	59412572	476	-0.22
442	FT	8	q	59474205	85686764	1019	0.1718
442	FT	8	q	59474205	85686764	1019	0.1718
442	FT	8	q	85716924	110703421	1433	1.0815
442	FT	8	q	85716924	110703421	1433	1.0815
442	FT	8	q	110980305	114627699	80	0.2039
442	FT	8	q	110980305	114627699	80	0.2039
442	FT	8	q	116426256	135817022	965	1.0348
442	FT	8	q	116426256	135817022	965	1.0348
442	FT	8	q	136246458	140743316	114	0.1698
442	FT	8	q	136246458	140743316	114	0.1698
442	FT	8	q	140744203	142366895	141	0.9822
442	FT	8	q	140744203	142366895	141	0.9822
442	FT	8	q	142367018	144463752	227	0.4712
442	FT	8	q	142367018	144463752	227	0.4712
442	FT	8	q	144464558	146279334	530	0.9543
442	FT	8	q	144464558	146279334	530	0.9543
442	FT	9	p	154731	44175608	2238	-0.0181
442	FT	9	p	154731	44175608	2238	-0.0181
442	FT	9	q	65602571	127693569	4032	-0.5258
442	FT	9	q	65602571	127693569	4032	-0.5258
442	FT	9	q	127700821	136379762	1710	-0.0477
442	FT	9	q	127700821	136379762	1710	-0.0477
442	FT	9	q	136380609	138716591	352	-0.483
442	FT	9	q	136380609	138716591	352	-0.483
442	FT	9	q	138719182	141071660	820	-0.0796
442	FT	9	q	138719182	141071660	820	-0.0796
442	FT	10	p	95123	25349943	1563	0.1595
442	FT	10	p	95123	25349943	1563	0.1595
442	FT	10	p	25464359	26802484	67	-0.5849
442	FT	10	p	25464359	26802484	67	-0.5849
442	FT	10	p	26822249	35842052	584	0.358
442	FT	10	p	26822249	35842052	584	0.358
442	FT	10	p	35854910	38740338	107	-0.1099
442	FT	10	p	35854910	38740338	107	-0.1099
442	FT	10	q	42379858	58118133	698	0.002
442	FT	10	q	42379858	58118133	698	0.002
442	FT	10	q	58119103	106125540	4332	0.2518
442	FT	10	q	58119103	106125540	4332	0.2518
442	FT	10	q	106128167	111633055	84	-0.4486
442	FT	10	q	106128167	111633055	84	-0.4486
442	FT	10	q	111635256	112748690	127	0.5801
442	FT	10	q	111635256	112748690	127	0.5801
442	FT	10	q	112760105	128114457	1263	0.1624
442	FT	10	q	112760105	128114457	1263	0.1624
442	FT	10	q	128118246	135473026	583	-0.1364
442	FT	10	q	128118246	135473026	583	-0.1364
442	FT	11	p	193052	1016268	365	0.1178
442	FT	11	p	193052	1016268	365	0.1178
442	FT	11	p	1016779	1501952	200	-0.5612
442	FT	11	p	1016779	1501952	200	-0.5612
442	FT	11	p	1502362	4185479	425	0.1363
442	FT	11	p	1502362	4185479	425	0.1363
442	FT	11	p	4388594	5989194	223	-0.5642
442	FT	11	p	4388594	5989194	223	-0.5642
442	FT	11	p	5989531	7981964	357	-0.1079
442	FT	11	p	5989531	7981964	357	-0.1079
442	FT	11	p	7984751	17352894	814	0.3006
442	FT	11	p	7984751	17352894	814	0.3006
442	FT	11	p	17373389	27136975	651	-0.0383
442	FT	11	p	17373389	27136975	651	-0.0383
442	FT	11	p	27141199	48175321	1367	0.1834
442	FT	11	p	27141199	48175321	1367	0.1834
442	FT	11	p	48177331	51527614	136	-0.5011
442	FT	11	p	48177331	51527614	136	-0.5011
442	FT	11	q	55035776	57004037	146	-0.9115
442	FT	11	q	55035776	57004037	146	-0.9115
442	FT	11	q	57067236	59612685	380	0.0439
442	FT	11	q	57067236	59612685	380	0.0439
442	FT	11	q	59620409	60285515	102	-0.645
442	FT	11	q	59620409	60285515	102	-0.645
442	FT	11	q	60291355	88070653	4023	0.2307
442	FT	11	q	60291355	88070653	4023	0.2307
442	FT	11	q	88241731	92881757	172	-0.3602
442	FT	11	q	88241731	92881757	172	-0.3602
442	FT	11	q	92887272	103191756	631	0.2622
442	FT	11	q	92887272	103191756	631	0.2622
442	FT	11	q	103194600	105924490	99	-0.3772
442	FT	11	q	103194600	105924490	99	-0.3772
442	FT	11	q	105929518	123600384	1836	0.2467
442	FT	11	q	105929518	123600384	1836	0.2467
442	FT	11	q	123601216	124482889	100	-0.6858
442	FT	11	q	123601216	124482889	100	-0.6858
442	FT	11	q	124487232	134856553	794	0.0574
442	FT	11	q	124487232	134856553	794	0.0574
442	FT	12	p	176061	6090898	659	0.0716
442	FT	12	p	176061	6090898	659	0.0716
442	FT	12	p	6092322	7090908	463	0.4679
442	FT	12	p	6092322	7090908	463	0.4679
442	FT	12	p	7091848	10875569	735	0.1595
442	FT	12	p	7091848	10875569	735	0.1595
442	FT	12	p	10954266	11548368	80	-0.4369
442	FT	12	p	10954266	11548368	80	-0.4369
442	FT	12	p	11802948	34182457	1480	0.3285
442	FT	12	p	11802948	34182457	1480	0.3285
442	FT	12	q	38710667	41410516	304	-0.2456
442	FT	12	q	38710667	41410516	304	-0.2456
442	FT	12	q	41414047	55368308	2217	0.2939
442	FT	12	q	41414047	55368308	2217	0.2939
442	FT	12	q	55420206	56030602	51	-0.5356
442	FT	12	q	55420206	56030602	51	-0.5356
442	FT	12	q	56075532	57145930	516	0.4779
442	FT	12	q	56075532	57145930	516	0.4779
442	FT	12	q	57167666	124221797	5881	0.2287
442	FT	12	q	57167666	124221797	5881	0.2287
442	FT	12	q	124228305	133810733	764	-0.0367
442	FT	12	q	124228305	133810733	764	-0.0367
442	FT	13	q	19600475	115089307	4157	-0.527
442	FT	13	q	19600475	115089307	4157	-0.527
442	FT	14	q	19685131	36789596	1957	-0.0216
442	FT	14	q	19685131	36789596	1957	-0.0216
442	FT	14	q	36840596	38724325	93	-0.5489
442	FT	14	q	36840596	38724325	93	-0.5489
442	FT	14	q	39502352	58907914	1142	0.1263
442	FT	14	q	39502352	58907914	1142	0.1263
442	FT	14	q	58909444	104578225	4002	-0.107
442	FT	14	q	58909444	104578225	4002	-0.107
442	FT	14	q	104578818	107283041	476	-0.5482
442	FT	14	q	104578818	107283041	476	-0.5482
442	FT	15	q	20169987	25415793	231	-0.5847
442	FT	15	q	20169987	25415793	231	-0.5847
442	FT	15	q	25417865	25523446	43	-1.6236
442	FT	15	q	25417865	25523446	43	-1.6236
442	FT	15	q	25584242	34388051	597	-0.2756
442	FT	15	q	25584242	34388051	597	-0.2756
442	FT	15	q	34393725	102462753	7225	-0.0632
442	FT	15	q	34393725	102462753	7225	-0.0632
442	FT	16	p	81704	34682162	4738	-0.141
442	FT	16	p	81704	34682162	4738	-0.141
442	FT	16	q	46508169	75703179	3145	-0.1301
442	FT	16	q	46508169	75703179	3145	-0.1301
442	FT	16	q	75728251	90161152	1337	-0.2761
442	FT	16	q	75728251	90161152	1337	-0.2761
442	FT	17	p	6004	9764425	2293	-0.1044
442	FT	17	p	6004	9764425	2293	-0.1044
442	FT	17	p	9765244	11865164	379	-0.6804
442	FT	17	p	9765244	11865164	379	-0.6804
442	FT	17	p	11872581	22066769	1130	-0.1746
442	FT	17	p	11872581	22066769	1130	-0.1746
442	FT	17	q	25620838	29509521	789	-0.0491
442	FT	17	q	25620838	29509521	789	-0.0491
442	FT	17	q	29527419	29661870	44	-2.2336
442	FT	17	q	29527419	29661870	44	-2.2336
442	FT	17	q	29663336	37673710	1120	-0.1199
442	FT	17	q	29663336	37673710	1120	-0.1199
442	FT	17	q	37676195	72240089	4898	0.2198
442	FT	17	q	37676195	72240089	4898	0.2198
442	FT	17	q	72245107	72691850	102	-0.4297
442	FT	17	q	72245107	72691850	102	-0.4297
442	FT	17	q	72692270	79894935	1756	0.1407
442	FT	17	q	72692270	79894935	1756	0.1407
442	FT	17	q	79898686	81083496	327	-0.4342
442	FT	17	q	79898686	81083496	327	-0.4342
442	FT	18	p	116845	15005846	1030	0.177
442	FT	18	p	116845	15005846	1030	0.177
442	FT	18	q	18531243	30907957	740	0.1571
442	FT	18	q	18531243	30907957	740	0.1571
442	FT	18	q	30913121	32711969	77	-0.8683
442	FT	18	q	30913121	32711969	77	-0.8683
442	FT	18	q	32720214	61151701	1301	-0.0639
442	FT	18	q	32720214	61151701	1301	-0.0639
442	FT	18	q	61154086	66344180	121	-0.7522
442	FT	18	q	61154086	66344180	121	-0.7522
442	FT	18	q	66346661	78005105	404	-0.1867
442	FT	18	q	66346661	78005105	404	-0.1867
442	FT	19	p	107094	12786599	3712	-0.5416
442	FT	19	p	107094	12786599	3712	-0.5416
442	FT	19	p	12787967	14693869	516	0.7741
442	FT	19	p	12787967	14693869	516	0.7741
442	FT	19	p	14694225	16146681	377	0.3635
442	FT	19	p	14694225	16146681	377	0.3635
442	FT	19	p	16178446	24345032	1489	0.6803
442	FT	19	p	16178446	24345032	1489	0.6803
442	FT	19	q	29567063	41962265	2364	0.591
442	FT	19	q	29567063	41962265	2364	0.591
442	FT	19	q	42027378	44977277	664	0.3633
442	FT	19	q	42027378	44977277	664	0.3633
442	FT	19	q	44980588	46352020	462	0.7323
442	FT	19	q	44980588	46352020	462	0.7323
442	FT	19	q	46355574	50882304	1343	-0.4175
442	FT	19	q	46355574	50882304	1343	-0.4175
442	FT	19	q	50882980	55297826	1253	-0.7768
442	FT	19	q	50882980	55297826	1253	-0.7768
442	FT	19	q	55299736	56241300	394	-0.4642
442	FT	19	q	55299736	56241300	394	-0.4642
442	FT	19	q	56243318	56552324	77	-1.3635
442	FT	19	q	56243318	56552324	77	-1.3635
442	FT	19	q	56561819	59083797	599	-0.7256
442	FT	19	q	56561819	59083797	599	-0.7256
442	FT	20	p	68260	26188891	1763	0.1743
442	FT	20	p	68260	26188891	1763	0.1743
442	FT	20	q	29625845	61039919	3327	0.2032
442	FT	20	q	29625845	61039919	3327	0.2032
442	FT	20	q	61040416	62234315	286	-0.2522
442	FT	20	q	61040416	62234315	286	-0.2522
442	FT	20	q	62236067	62959197	206	0.1737
442	FT	20	q	62236067	62959197	206	0.1737
442	FT	21	p	9825764	11098633	36	-0.7178
442	FT	21	p	9825764	11098633	36	-0.7178
442	FT	21	q	14745307	31233907	428	-0.8579
442	FT	21	q	14745307	31233907	428	-0.8579
442	FT	21	q	31311665	32410709	60	-1.7917
442	FT	21	q	31311665	32410709	60	-1.7917
442	FT	21	q	32433443	45730808	1421	0.0271
442	FT	21	q	32433443	45730808	1421	0.0271
442	FT	21	q	45731920	48084180	533	-0.3034
442	FT	21	q	45731920	48084180	533	-0.3034
442	FT	22	q	16157526	51220584	5002	-0.5497
442	FT	22	q	16157526	51220584	5002	-0.5497
442	FT	23	p	2699993	24227098	1210	-0.5597
442	FT	23	p	2699993	24227098	1210	-0.5597
442	FT	23	p	24228257	37265358	372	-1.0301
442	FT	23	p	24228257	37265358	372	-1.0301
442	FT	23	p	37285091	57936608	1630	-0.5475
442	FT	23	p	37285091	57936608	1630	-0.5475
442	FT	23	q	62519303	154774733	4532	-0.6696
442	FT	23	q	62519303	154774733	4532	-0.6696
442	Om	1	p	65832	2420647	602	-0.5601
442	Om	1	p	65832	2420647	602	-0.5601
442	Om	1	p	2421190	6273128	380	-0.7549
442	Om	1	p	2421190	6273128	380	-0.7549
442	Om	1	p	6278271	23660050	2574	-0.5689
442	Om	1	p	6278271	23660050	2574	-0.5689
442	Om	1	p	23664328	31538454	1106	-0.477
442	Om	1	p	23664328	31538454	1106	-0.477
442	Om	1	p	31654489	32479629	190	1.1227
442	Om	1	p	31654489	32479629	190	1.1227
442	Om	1	p	32495912	34498209	375	0.9125
442	Om	1	p	32495912	34498209	375	0.9125
442	Om	1	p	34554620	47059811	1928	0.5731
442	Om	1	p	34554620	47059811	1928	0.5731
442	Om	1	p	47060619	49711362	205	0.8544
442	Om	1	p	47060619	49711362	205	0.8544
442	Om	1	p	50162945	50907086	27	-0.3688
442	Om	1	p	50162945	50907086	27	-0.3688
442	Om	1	p	50917734	121310476	4902	0.1584
442	Om	1	p	50917734	121310476	4902	0.1584
442	Om	1	q	144013835	152009239	985	0.2565
442	Om	1	q	144013835	152009239	985	0.2565
442	Om	1	q	152056513	153303268	153	-0.2565
442	Om	1	q	152056513	153303268	153	-0.2565
442	Om	1	q	153309614	156785538	1235	0.26
442	Om	1	q	153309614	156785538	1235	0.26
442	Om	1	q	156785780	159684225	434	0.002
442	Om	1	q	156785780	159684225	434	0.002
442	Om	1	q	159750873	228456494	5960	0.1722
442	Om	1	q	159750873	228456494	5960	0.1722
442	Om	1	q	228459620	228565916	110	-0.1555
442	Om	1	q	228459620	228565916	110	-0.1555
442	Om	1	q	228566359	236767167	743	0.2135
442	Om	1	q	228566359	236767167	743	0.2135
442	Om	1	q	236849931	243375054	366	-0.043
442	Om	1	q	236849931	243375054	366	-0.043
442	Om	1	q	243384988	247274833	291	0.1775
442	Om	1	q	243384988	247274833	291	0.1775
442	Om	1	q	247287064	249211066	190	-0.0322
442	Om	1	q	247287064	249211066	190	-0.0322
442	Om	2	p	41460	3653645	182	0.0885
442	Om	2	p	41460	3653645	182	0.0885
442	Om	2	p	3660809	5833307	35	-0.3818
442	Om	2	p	3660809	5833307	35	-0.3818
442	Om	2	p	6980628	89185422	5862	0.1509
442	Om	2	p	6980628	89185422	5862	0.1509
442	Om	2	p	89185598	91960853	98	-0.14
442	Om	2	p	89185598	91960853	98	-0.14
442	Om	2	q	95537299	114714850	1714	0.1478
442	Om	2	q	95537299	114714850	1714	0.1478
442	Om	2	q	115200342	116599707	29	-0.3715
442	Om	2	q	115200342	116599707	29	-0.3715
442	Om	2	q	118572274	169758951	2624	0.0799
442	Om	2	q	118572274	169758951	2624	0.0799
442	Om	2	q	169760948	179368398	933	0.1856
442	Om	2	q	169760948	179368398	933	0.1856
442	Om	2	q	179391769	179647030	269	-0.1848
442	Om	2	q	179391769	179647030	269	-0.1848
442	Om	2	q	179647573	205912337	1800	0.1475
442	Om	2	q	179647573	205912337	1800	0.1475
442	Om	2	q	205969050	243037046	3709	-0.62
442	Om	2	q	205969050	243037046	3709	-0.62
442	Om	3	p	239351	90283547	6445	0.1009
442	Om	3	p	239351	90283547	6445	0.1009
442	Om	3	q	93593119	138216798	3350	0.1138
442	Om	3	q	93593119	138216798	3350	0.1138
442	Om	3	q	138218884	197765390	3648	0.2091
442	Om	3	q	138218884	197765390	3648	0.2091
442	Om	4	p	53239	11400644	1268	0.0741
442	Om	4	p	53239	11400644	1268	0.0741
442	Om	4	p	13370106	17964578	314	-0.5687
442	Om	4	p	13370106	17964578	314	-0.5687
442	Om	4	p	17974393	22820355	106	0.1413
442	Om	4	p	17974393	22820355	106	0.1413
442	Om	4	p	23797334	23891511	13	-1.7715
442	Om	4	p	23797334	23891511	13	-1.7715
442	Om	4	p	24521821	26640339	180	-0.5391
442	Om	4	p	24521821	26640339	180	-0.5391
442	Om	4	p	26641710	28821141	41	-1.1122
442	Om	4	p	26641710	28821141	41	-1.1122
442	Om	4	p	30132781	43022261	561	0.1288
442	Om	4	p	30132781	43022261	561	0.1288
442	Om	4	p	43032423	49063825	316	-0.6904
442	Om	4	p	43032423	49063825	316	-0.6904
442	Om	4	q	52709329	65274852	490	-0.6026
442	Om	4	q	52709329	65274852	490	-0.6026
442	Om	4	q	66189798	67142486	21	-2.163
442	Om	4	q	66189798	67142486	21	-2.163
442	Om	4	q	68214353	69337133	128	-0.6371
442	Om	4	q	68214353	69337133	128	-0.6371
442	Om	4	q	69340357	69434129	13	-1.8617
442	Om	4	q	69340357	69434129	13	-1.8617
442	Om	4	q	69528680	71398068	150	-0.5985
442	Om	4	q	69528680	71398068	150	-0.5985
442	Om	4	q	71457966	75937643	341	0.1278
442	Om	4	q	71457966	75937643	341	0.1278
442	Om	4	q	75959086	77941788	250	-0.6115
442	Om	4	q	75959086	77941788	250	-0.6115
442	Om	4	q	77949806	78665953	39	-2.6739
442	Om	4	q	77949806	78665953	39	-2.6739
442	Om	4	q	78669362	80246774	158	-0.5428
442	Om	4	q	78669362	80246774	158	-0.5428
442	Om	4	q	80327672	82125701	65	-2.765
442	Om	4	q	80327672	82125701	65	-2.765
442	Om	4	q	82348850	86643588	293	-0.5338
442	Om	4	q	82348850	86643588	293	-0.5338
442	Om	4	q	86749078	87797621	82	-2.959
442	Om	4	q	86749078	87797621	82	-2.959
442	Om	4	q	87808833	107288444	960	-0.5524
442	Om	4	q	87808833	107288444	960	-0.5524
442	Om	4	q	107845096	115597047	458	0.1249
442	Om	4	q	107845096	115597047	458	0.1249
442	Om	4	q	115748988	143352236	902	-0.5979
442	Om	4	q	115748988	143352236	902	-0.5979
442	Om	4	q	144106610	144614238	61	0.1616
442	Om	4	q	144106610	144614238	61	0.1616
442	Om	4	q	144616606	151682882	312	-0.5685
442	Om	4	q	144616606	151682882	312	-0.5685
442	Om	4	q	151719168	151849972	35	0.1376
442	Om	4	q	151719168	151849972	35	0.1376
442	Om	4	q	151935531	153809257	103	-0.5755
442	Om	4	q	151935531	153809257	103	-0.5755
442	Om	4	q	153831209	154523671	67	-0.0759
442	Om	4	q	153831209	154523671	67	-0.0759
442	Om	4	q	154524481	190947898	1413	-0.6251
442	Om	4	q	154524481	190947898	1413	-0.6251
442	Om	5	p	140385	7826717	500	-0.0819
442	Om	5	p	140385	7826717	500	-0.0819
442	Om	5	p	7832008	45696008	1598	0.0876
442	Om	5	p	7832008	45696008	1598	0.0876
442	Om	5	q	49695036	159912336	6725	0.0785
442	Om	5	q	49695036	159912336	6725	0.0785
442	Om	5	q	159992454	161580125	73	-0.2655
442	Om	5	q	159992454	161580125	73	-0.2655
442	Om	5	q	162866310	180687068	1490	0.0352
442	Om	5	q	162866310	180687068	1490	0.0352
442	Om	6	p	203389	25926012	1317	0.5487
442	Om	6	p	203389	25926012	1317	0.5487
442	Om	6	p	25966766	26365493	89	0.9557
442	Om	6	p	25966766	26365493	89	0.9557
442	Om	6	p	26368357	36590220	924	0.5959
442	Om	6	p	26368357	36590220	924	0.5959
442	Om	6	p	36645511	47576858	1451	0.1256
442	Om	6	p	36645511	47576858	1451	0.1256
442	Om	6	p	47580192	51907611	182	-0.1599
442	Om	6	p	47580192	51907611	182	-0.1599
442	Om	6	p	51907734	58287628	497	0.0625
442	Om	6	p	51907734	58287628	497	0.0625
442	Om	6	q	62390794	70894655	192	-0.0912
442	Om	6	q	62390794	70894655	192	-0.0912
442	Om	6	q	70897732	170893399	5620	0.0652
442	Om	6	q	70897732	170893399	5620	0.0652
442	Om	7	p	193221	5342402	613	0.0208
442	Om	7	p	193221	5342402	613	0.0208
442	Om	7	p	5347061	57076619	3136	0.1273
442	Om	7	p	5347061	57076619	3136	0.1273
442	Om	7	p	57187951	57529548	16	-0.4149
442	Om	7	p	57187951	57529548	16	-0.4149
442	Om	7	q	62758725	63726541	32	-0.2481
442	Om	7	q	62758725	63726541	32	-0.2481
442	Om	7	q	63727108	100547242	2857	0.1283
442	Om	7	q	63727108	100547242	2857	0.1283
442	Om	7	q	100549499	100696603	87	-0.3596
442	Om	7	q	100549499	100696603	87	-0.3596
442	Om	7	q	100699367	141463988	2928	0.1072
442	Om	7	q	100699367	141463988	2928	0.1072
442	Om	7	q	141464158	149523511	827	-0.0083
442	Om	7	q	141464158	149523511	827	-0.0083
442	Om	7	q	149524840	153417465	483	0.1403
442	Om	7	q	149524840	153417465	483	0.1403
442	Om	7	q	153584634	154684453	31	-0.457
442	Om	7	q	153584634	154684453	31	-0.457
442	Om	7	q	154720340	157178114	186	0.1397
442	Om	7	q	154720340	157178114	186	0.1397
442	Om	7	q	157202518	158415352	49	-0.5211
442	Om	7	q	157202518	158415352	49	-0.5211
442	Om	7	q	158424281	159025864	101	0.1044
442	Om	7	q	158424281	159025864	101	0.1044
442	Om	8	p	182714	6371197	241	-0.878
442	Om	8	p	182714	6371197	241	-0.878
442	Om	8	p	6372126	31497895	1796	-0.6234
442	Om	8	p	6372126	31497895	1796	-0.6234
442	Om	8	p	32406155	43211930	845	0.1062
442	Om	8	p	32406155	43211930	845	0.1062
442	Om	8	q	47752736	48962438	146	0.1065
442	Om	8	q	47752736	48962438	146	0.1065
442	Om	8	q	48973163	53536185	106	-0.1922
442	Om	8	q	48973163	53536185	106	-0.1922
442	Om	8	q	53537174	87588321	1399	0.1482
442	Om	8	q	53537174	87588321	1399	0.1482
442	Om	8	q	87590929	89340088	48	-0.2225
442	Om	8	q	87590929	89340088	48	-0.2225
442	Om	8	q	90770322	135817022	2274	0.1969
442	Om	8	q	90770322	135817022	2274	0.1969
442	Om	8	q	136246458	146279334	1012	0.087
442	Om	8	q	136246458	146279334	1012	0.087
442	Om	9	p	154731	44175608	2238	0.0537
442	Om	9	p	154731	44175608	2238	0.0537
442	Om	9	q	65602571	127693569	4032	-0.5937
442	Om	9	q	65602571	127693569	4032	-0.5937
442	Om	9	q	127700821	132985322	1025	0.1034
442	Om	9	q	127700821	132985322	1025	0.1034
442	Om	9	q	132988653	141071660	1857	-0.0304
442	Om	9	q	132988653	141071660	1857	-0.0304
442	Om	10	p	95123	15089291	913	-0.0161
442	Om	10	p	95123	15089291	913	-0.0161
442	Om	10	p	15091619	19739268	349	-0.2236
442	Om	10	p	15091619	19739268	349	-0.2236
442	Om	10	p	19777921	38740338	1059	-0.074
442	Om	10	p	19777921	38740338	1059	-0.074
442	Om	10	q	42379858	59955841	706	-0.098
442	Om	10	q	42379858	59955841	706	-0.098
442	Om	10	q	59956063	79628869	1564	0.0231
442	Om	10	q	59956063	79628869	1564	0.0231
442	Om	10	q	79685962	106125540	2760	-0.1061
442	Om	10	q	79685962	106125540	2760	-0.1061
442	Om	10	q	106128167	111631471	83	-0.5495
442	Om	10	q	106128167	111631471	83	-0.5495
442	Om	10	q	111633055	127530305	1344	-0.1149
442	Om	10	q	111633055	127530305	1344	-0.1149
442	Om	10	q	127540909	135473026	630	0.2269
442	Om	10	q	127540909	135473026	630	0.2269
442	Om	11	p	193052	988578	342	0.1268
442	Om	11	p	193052	988578	342	0.1268
442	Om	11	p	992490	1576205	229	-0.2383
442	Om	11	p	992490	1576205	229	-0.2383
442	Om	11	p	1576441	4156356	417	0.1112
442	Om	11	p	1576441	4156356	417	0.1112
442	Om	11	p	4159453	6238668	260	-0.1896
442	Om	11	p	4159453	6238668	260	-0.1896
442	Om	11	p	6238926	8013366	327	-0.0071
442	Om	11	p	6238926	8013366	327	-0.0071
442	Om	11	p	8013711	17099385	769	0.1757
442	Om	11	p	8013711	17099385	769	0.1757
442	Om	11	p	17111257	27136975	691	0.0201
442	Om	11	p	17111257	27136975	691	0.0201
442	Om	11	p	27141199	48238344	1373	0.1284
442	Om	11	p	27141199	48238344	1373	0.1284
442	Om	11	p	48238467	51527614	130	-0.3324
442	Om	11	p	48238467	51527614	130	-0.3324
442	Om	11	q	55035776	55861360	59	-0.4502
442	Om	11	q	55035776	55861360	59	-0.4502
442	Om	11	q	55872509	56805289	83	-1.0167
442	Om	11	q	55872509	56805289	83	-1.0167
442	Om	11	q	56949341	57596580	177	-0.5296
442	Om	11	q	56949341	57596580	177	-0.5296
442	Om	11	q	57798422	58207463	38	-0.9293
442	Om	11	q	57798422	58207463	38	-0.9293
442	Om	11	q	58274597	58391522	35	0.1923
442	Om	11	q	58274597	58391522	35	0.1923
442	Om	11	q	58477210	58723272	25	-0.6463
442	Om	11	q	58477210	58723272	25	-0.6463
442	Om	11	q	58877020	59665651	119	0.0512
442	Om	11	q	58877020	59665651	119	0.0512
442	Om	11	q	59665907	59997294	40	-1.0975
442	Om	11	q	59665907	59997294	40	-1.0975
442	Om	11	q	60048123	60309978	56	-0.2584
442	Om	11	q	60048123	60309978	56	-0.2584
442	Om	11	q	60468284	62301259	465	0.1499
442	Om	11	q	60468284	62301259	465	0.1499
442	Om	11	q	62302521	62656037	214	0.3572
442	Om	11	q	62302521	62656037	214	0.3572
442	Om	11	q	62677157	63177237	69	-0.0897
442	Om	11	q	62677157	63177237	69	-0.0897
442	Om	11	q	63230863	67932002	1565	0.2407
442	Om	11	q	63230863	67932002	1565	0.2407
442	Om	11	q	67933346	123600384	4444	0.1495
442	Om	11	q	67933346	123600384	4444	0.1495
442	Om	11	q	123601216	124413259	92	-0.2189
442	Om	11	q	123601216	124413259	92	-0.2189
442	Om	11	q	124413423	131530753	629	0.1064
442	Om	11	q	124413423	131530753	629	0.1064
442	Om	11	q	131781462	133791963	39	-1.1017
442	Om	11	q	131781462	133791963	39	-1.1017
442	Om	11	q	133792385	134856553	134	-0.6865
442	Om	11	q	133792385	134856553	134	-0.6865
442	Om	12	p	176061	6153470	692	0.0946
442	Om	12	p	176061	6153470	692	0.0946
442	Om	12	p	6155884	7475030	529	0.2683
442	Om	12	p	6155884	7475030	529	0.2683
442	Om	12	p	7475768	10875569	636	0.0724
442	Om	12	p	7475768	10875569	636	0.0724
442	Om	12	p	10954266	11548368	80	-0.2382
442	Om	12	p	10954266	11548368	80	-0.2382
442	Om	12	p	11802948	16112709	345	0.2316
442	Om	12	p	11802948	16112709	345	0.2316
442	Om	12	p	16115740	22602677	376	0.0241
442	Om	12	p	16115740	22602677	376	0.0241
442	Om	12	p	22606745	34182457	759	0.1676
442	Om	12	p	22606745	34182457	759	0.1676
442	Om	12	q	38710667	41352891	299	-0.101
442	Om	12	q	38710667	41352891	299	-0.101
442	Om	12	q	41365165	55368308	2222	0.1751
442	Om	12	q	41365165	55368308	2222	0.1751
442	Om	12	q	55420206	56030602	51	-0.3007
442	Om	12	q	55420206	56030602	51	-0.3007
442	Om	12	q	56075532	57094613	486	0.2893
442	Om	12	q	56075532	57094613	486	0.2893
442	Om	12	q	57106332	113822558	4597	0.1422
442	Om	12	q	57106332	113822558	4597	0.1422
442	Om	12	q	113822976	116398985	76	-0.1798
442	Om	12	q	113822976	116398985	76	-0.1798
442	Om	12	q	116401153	124124359	1201	0.1966
442	Om	12	q	116401153	124124359	1201	0.1966
442	Om	12	q	124130011	133810733	801	0.0756
442	Om	12	q	124130011	133810733	801	0.0756
442	Om	13	q	19600475	25914073	507	-0.5907
442	Om	13	q	19600475	25914073	507	-0.5907
442	Om	13	q	25946284	26706456	54	-1.0739
442	Om	13	q	25946284	26706456	54	-1.0739
442	Om	13	q	26787923	39588230	830	-0.6097
442	Om	13	q	26787923	39588230	830	-0.6097
442	Om	13	q	39591522	48807472	557	-0.4721
442	Om	13	q	39591522	48807472	557	-0.4721
442	Om	13	q	48827882	48985563	22	-2.0285
442	Om	13	q	48827882	48985563	22	-2.0285
442	Om	13	q	49027125	115089307	2187	-0.5431
442	Om	13	q	49027125	115089307	2187	-0.5431
442	Om	14	q	19685131	20711333	49	-0.7104
442	Om	14	q	19685131	20711333	49	-0.7104
442	Om	14	q	20757803	36840886	1911	-0.0984
442	Om	14	q	20757803	36840886	1911	-0.0984
442	Om	14	q	36942952	38724325	90	-0.4252
442	Om	14	q	36942952	38724325	90	-0.4252
442	Om	14	q	39502352	100992246	4557	-0.1246
442	Om	14	q	39502352	100992246	4557	-0.1246
442	Om	14	q	100995440	102027825	124	-0.4911
442	Om	14	q	100995440	102027825	124	-0.4911
442	Om	14	q	102196704	104570664	457	-0.1374
442	Om	14	q	102196704	104570664	457	-0.1374
442	Om	14	q	104571596	107283041	482	-0.3468
442	Om	14	q	104571596	107283041	482	-0.3468
442	Om	15	q	20169987	23807142	162	-0.0706
442	Om	15	q	20169987	23807142	162	-0.0706
442	Om	15	q	23807267	25420157	71	-0.4182
442	Om	15	q	23807267	25420157	71	-0.4182
442	Om	15	q	25422062	25514841	40	-0.8262
442	Om	15	q	25422062	25514841	40	-0.8262
442	Om	15	q	25523446	56471415	3461	0.034
442	Om	15	q	25523446	56471415	3461	0.034
442	Om	15	q	56535256	72533749	1690	0.1371
442	Om	15	q	56535256	72533749	1690	0.1371
442	Om	15	q	72534238	102462753	2672	0.0682
442	Om	15	q	72534238	102462753	2672	0.0682
442	Om	16	p	81704	857503	377	0.0838
442	Om	16	p	81704	857503	377	0.0838
442	Om	16	p	863284	1326602	99	-0.3732
442	Om	16	p	863284	1326602	99	-0.3732
442	Om	16	p	1358681	16284059	2002	0.1284
442	Om	16	p	1358681	16284059	2002	0.1284
442	Om	16	p	16286633	29001430	1401	0.0452
442	Om	16	p	16286633	29001430	1401	0.0452
442	Om	16	p	29086335	31202636	594	0.2342
442	Om	16	p	29086335	31202636	594	0.2342
442	Om	16	p	31212833	33783051	230	-0.0581
442	Om	16	p	31212833	33783051	230	-0.0581
442	Om	16	p	33783243	34682162	35	-0.5722
442	Om	16	p	33783243	34682162	35	-0.5722
442	Om	16	q	46508169	89353374	4205	-0.0661
442	Om	16	q	46508169	89353374	4205	-0.0661
442	Om	16	q	89354925	90161152	277	0.1214
442	Om	16	q	89354925	90161152	277	0.1214
442	Om	17	p	6004	2966834	499	-0.5123
442	Om	17	p	6004	2966834	499	-0.5123
442	Om	17	p	2995461	3489059	81	-0.9416
442	Om	17	p	2995461	3489059	81	-0.9416
442	Om	17	p	3491486	6387479	729	-0.5995
442	Om	17	p	3491486	6387479	729	-0.5995
442	Om	17	p	6406813	10210301	1017	-0.4851
442	Om	17	p	6406813	10210301	1017	-0.4851
442	Om	17	p	10212590	11865164	346	-0.967
442	Om	17	p	10212590	11865164	346	-0.967
442	Om	17	p	11872581	22066769	1130	-0.5741
442	Om	17	p	11872581	22066769	1130	-0.5741
442	Om	17	q	25620838	29509521	789	-0.5295
442	Om	17	q	25620838	29509521	789	-0.5295
442	Om	17	q	29527419	29661870	44	-2.4557
442	Om	17	q	29527419	29661870	44	-2.4557
442	Om	17	q	29663336	33984602	457	-0.5689
442	Om	17	q	29663336	33984602	457	-0.5689
442	Om	17	q	33997794	81083496	7746	0.1732
442	Om	17	q	33997794	81083496	7746	0.1732
442	Om	18	p	116845	15005846	1030	-0.2886
442	Om	18	p	116845	15005846	1030	-0.2886
442	Om	18	q	18531243	30672637	729	-0.1769
442	Om	18	q	18531243	30672637	729	-0.1769
442	Om	18	q	30791837	32461994	78	-1.2028
442	Om	18	q	30791837	32461994	78	-1.2028
442	Om	18	q	32464616	78005105	1836	-0.2298
442	Om	18	q	32464616	78005105	1836	-0.2298
442	Om	19	p	107094	1244056	402	-1.0533
442	Om	19	p	107094	1244056	402	-1.0533
442	Om	19	p	1250372	8595093	2040	-0.3292
442	Om	19	p	1250372	8595093	2040	-0.3292
442	Om	19	p	8601081	10169612	404	-0.4657
442	Om	19	p	8601081	10169612	404	-0.4657
442	Om	19	p	10192328	13616717	1125	-0.2555
442	Om	19	p	10192328	13616717	1125	-0.2555
442	Om	19	p	13862555	14673214	247	0.0737
442	Om	19	p	13862555	14673214	247	0.0737
442	Om	19	p	14673948	16146681	387	-0.2017
442	Om	19	p	14673948	16146681	387	-0.2017
442	Om	19	p	16178446	18248060	627	0.0246
442	Om	19	p	16178446	18248060	627	0.0246
442	Om	19	p	18249800	22154930	710	-0.5931
442	Om	19	p	18249800	22154930	710	-0.5931
442	Om	19	p	22157133	23328879	80	-1.0098
442	Om	19	p	22157133	23328879	80	-1.0098
442	Om	19	p	23329224	24345032	72	-0.5745
442	Om	19	p	23329224	24345032	72	-0.5745
442	Om	19	q	29567063	41075489	2053	-0.654
442	Om	19	q	29567063	41075489	2053	-0.654
442	Om	19	q	41076318	42027905	315	-0.4702
442	Om	19	q	41076318	42027905	315	-0.4702
442	Om	19	q	42028070	45029083	680	-0.7098
442	Om	19	q	42028070	45029083	680	-0.7098
442	Om	19	q	45033425	50902163	1789	-0.5443
442	Om	19	q	45033425	50902163	1789	-0.5443
442	Om	19	q	50902538	54602806	968	-0.762
442	Om	19	q	50902538	54602806	968	-0.762
442	Om	19	q	54604059	54726375	85	-0.4167
442	Om	19	q	54604059	54726375	85	-0.4167
442	Om	19	q	54726654	55559566	287	-0.9232
442	Om	19	q	54726654	55559566	287	-0.9232
442	Om	19	q	55560010	56196717	284	-0.5869
442	Om	19	q	55560010	56196717	284	-0.5869
442	Om	19	q	56200141	57743420	263	-0.9236
442	Om	19	q	56200141	57743420	263	-0.9236
442	Om	19	q	57743855	59083797	432	-0.6049
442	Om	19	q	57743855	59083797	432	-0.6049
442	Om	20	p	68260	26188891	1763	0.0567
442	Om	20	p	68260	26188891	1763	0.0567
442	Om	20	q	29625845	30037727	24	-0.3943
442	Om	20	q	29625845	30037727	24	-0.3943
442	Om	20	q	30053258	39744996	1435	0.1729
442	Om	20	q	30053258	39744996	1435	0.1729
442	Om	20	q	39746895	42979323	253	-0.0303
442	Om	20	q	39746895	42979323	253	-0.0303
442	Om	20	q	42984404	58646095	1415	0.177
442	Om	20	q	42984404	58646095	1415	0.177
442	Om	20	q	58883457	61847143	336	0.0144
442	Om	20	q	58883457	61847143	336	0.0144
442	Om	20	q	61867383	62127204	105	-0.2629
442	Om	20	q	61867383	62127204	105	-0.2629
442	Om	20	q	62128922	62959197	251	0.1098
442	Om	20	q	62128922	62959197	251	0.1098
442	Om	21	p	9825764	9907174	4	-2.1426
442	Om	21	p	9825764	9907174	4	-2.1426
442	Om	21	p	9908284	11098633	32	-0.4283
442	Om	21	p	9908284	11098633	32	-0.4283
442	Om	21	q	14745307	16031035	76	-0.8389
442	Om	21	q	14745307	16031035	76	-0.8389
442	Om	21	q	16337016	20058281	106	0.135
442	Om	21	q	16337016	20058281	106	0.135
442	Om	21	q	22370838	27141425	68	-0.6443
442	Om	21	q	22370838	27141425	68	-0.6443
442	Om	21	q	27253902	30830350	153	0.5468
442	Om	21	q	27253902	30830350	153	0.5468
442	Om	21	q	30909527	31233907	25	-0.1088
442	Om	21	q	30909527	31233907	25	-0.1088
442	Om	21	q	31311665	32201796	55	-0.9561
442	Om	21	q	31311665	32201796	55	-0.9561
442	Om	21	q	32253347	38884438	704	0.5724
442	Om	21	q	32253347	38884438	704	0.5724
442	Om	21	q	38997389	45557095	675	0.1313
442	Om	21	q	38997389	45557095	675	0.1313
442	Om	21	q	45560055	48084180	580	-0.0276
442	Om	21	q	45560055	48084180	580	-0.0276
442	Om	22	q	16157526	17156461	18	-1.2228
442	Om	22	q	16157526	17156461	18	-1.2228
442	Om	22	q	17156758	35481402	2468	-0.5969
442	Om	22	q	17156758	35481402	2468	-0.5969
442	Om	22	q	35658244	43563141	1558	-0.5104
442	Om	22	q	35658244	43563141	1558	-0.5104
442	Om	22	q	43564047	51220584	958	-0.6368
442	Om	22	q	43564047	51220584	958	-0.6368
442	Om	23	p	2699993	24227098	1210	-0.9919
442	Om	23	p	2699993	24227098	1210	-0.9919
442	Om	23	p	24228257	37265358	372	-1.2035
442	Om	23	p	24228257	37265358	372	-1.2035
442	Om	23	p	37285091	56592032	1602	-1.0008
442	Om	23	p	37285091	56592032	1602	-1.0008
442	Om	23	p	57010746	57936608	28	-0.0468
442	Om	23	p	57010746	57936608	28	-0.0468
442	Om	23	q	62519303	154774733	4532	0.3088
442	Om	23	q	62519303	154774733	4532	0.3088
442	Ov	1	p	65832	31538454	4662	-0.5073
442	Ov	1	p	65832	31538454	4662	-0.5073
442	Ov	1	p	31654489	32375690	182	1.0929
442	Ov	1	p	31654489	32375690	182	1.0929
442	Ov	1	p	32377385	34554620	384	0.8753
442	Ov	1	p	32377385	34554620	384	0.8753
442	Ov	1	p	34630444	47173673	1957	0.5204
442	Ov	1	p	34630444	47173673	1957	0.5204
442	Ov	1	p	47182004	49711362	175	0.865
442	Ov	1	p	47182004	49711362	175	0.865
442	Ov	1	p	50162945	121310476	4929	0.0517
442	Ov	1	p	50162945	121310476	4929	0.0517
442	Ov	1	q	144013835	184446552	5231	0.129
442	Ov	1	q	144013835	184446552	5231	0.129
442	Ov	1	q	184476699	200842138	762	0.0053
442	Ov	1	q	184476699	200842138	762	0.0053
442	Ov	1	q	200842667	211441200	1471	0.1799
442	Ov	1	q	200842667	211441200	1471	0.1799
442	Ov	1	q	211444473	249211066	3003	0.0755
442	Ov	1	q	211444473	249211066	3003	0.0755
442	Ov	2	p	41460	91960853	6177	0.0576
442	Ov	2	p	41460	91960853	6177	0.0576
442	Ov	2	q	95537299	160128156	3683	0.0726
442	Ov	2	q	95537299	160128156	3683	0.0726
442	Ov	2	q	160132031	205912337	3686	-0.0093
442	Ov	2	q	160132031	205912337	3686	-0.0093
442	Ov	2	q	205969050	243037046	3709	-0.5719
442	Ov	2	q	205969050	243037046	3709	-0.5719
442	Ov	3	p	239351	90283547	6445	0.1059
442	Ov	3	p	239351	90283547	6445	0.1059
442	Ov	3	q	93593119	154138802	4276	0.083
442	Ov	3	q	93593119	154138802	4276	0.083
442	Ov	3	q	154145349	197765390	2722	0.236
442	Ov	3	q	154145349	197765390	2722	0.236
442	Ov	4	p	53239	11400644	1268	0.1329
442	Ov	4	p	53239	11400644	1268	0.1329
442	Ov	4	p	13370106	18023152	316	-0.6425
442	Ov	4	p	13370106	18023152	316	-0.6425
442	Ov	4	p	20255446	22820355	104	0.073
442	Ov	4	p	20255446	22820355	104	0.073
442	Ov	4	p	23797334	23891511	13	-1.8704
442	Ov	4	p	23797334	23891511	13	-1.8704
442	Ov	4	p	24521821	26667906	183	-0.6662
442	Ov	4	p	24521821	26667906	183	-0.6662
442	Ov	4	p	26673698	28821141	38	-1.1555
442	Ov	4	p	26673698	28821141	38	-1.1555
442	Ov	4	p	30132781	43022261	561	0.0529
442	Ov	4	p	30132781	43022261	561	0.0529
442	Ov	4	p	43032423	49063825	316	-0.6669
442	Ov	4	p	43032423	49063825	316	-0.6669
442	Ov	4	q	52709329	65274852	490	-0.6651
442	Ov	4	q	52709329	65274852	490	-0.6651
442	Ov	4	q	66189798	66535248	20	-2.3147
442	Ov	4	q	66189798	66535248	20	-2.3147
442	Ov	4	q	67142486	71398068	292	-0.6956
442	Ov	4	q	67142486	71398068	292	-0.6956
442	Ov	4	q	71457966	75959086	342	0.021
442	Ov	4	q	71457966	75959086	342	0.021
442	Ov	4	q	75971329	77941788	249	-0.7096
442	Ov	4	q	75971329	77941788	249	-0.7096
442	Ov	4	q	77949806	78665953	39	-2.616
442	Ov	4	q	77949806	78665953	39	-2.616
442	Ov	4	q	78669362	80246774	158	-0.5442
442	Ov	4	q	78669362	80246774	158	-0.5442
442	Ov	4	q	80327672	82125701	65	-2.6357
442	Ov	4	q	80327672	82125701	65	-2.6357
442	Ov	4	q	82348850	86643588	293	-0.6673
442	Ov	4	q	82348850	86643588	293	-0.6673
442	Ov	4	q	86749078	87797621	82	-2.7608
442	Ov	4	q	86749078	87797621	82	-2.7608
442	Ov	4	q	87808833	107279383	958	-0.6517
442	Ov	4	q	87808833	107279383	958	-0.6517
442	Ov	4	q	107288157	115597047	460	0.0727
442	Ov	4	q	107288157	115597047	460	0.0727
442	Ov	4	q	115748988	143352236	902	-0.7031
442	Ov	4	q	115748988	143352236	902	-0.7031
442	Ov	4	q	144106610	144616606	62	0.0294
442	Ov	4	q	144106610	144616606	62	0.0294
442	Ov	4	q	144794540	190947898	1929	-0.6207
442	Ov	4	q	144794540	190947898	1929	-0.6207
442	Ov	5	p	140385	34757362	1259	0.139
442	Ov	5	p	140385	34757362	1259	0.139
442	Ov	5	p	34795972	45696008	839	0.0156
442	Ov	5	p	34795972	45696008	839	0.0156
442	Ov	5	q	49695036	139006346	4647	0.0262
442	Ov	5	q	49695036	139006346	4647	0.0262
442	Ov	5	q	139060108	180687068	3641	0.1271
442	Ov	5	q	139060108	180687068	3641	0.1271
442	Ov	6	p	203389	36569535	2329	0.5366
442	Ov	6	p	203389	36569535	2329	0.5366
442	Ov	6	p	36590220	44198465	1172	0.1457
442	Ov	6	p	36590220	44198465	1172	0.1457
442	Ov	6	p	44199035	58287628	959	0.0263
442	Ov	6	p	44199035	58287628	959	0.0263
442	Ov	6	q	62390794	151865697	4495	0.0357
442	Ov	6	q	62390794	151865697	4495	0.0357
442	Ov	6	q	151869488	170893399	1317	0.1355
442	Ov	6	q	151869488	170893399	1317	0.1355
442	Ov	7	p	193221	57529548	3765	0.1233
442	Ov	7	p	193221	57529548	3765	0.1233
442	Ov	7	q	62758725	76634125	891	0.1514
442	Ov	7	q	62758725	76634125	891	0.1514
442	Ov	7	q	76634846	93623662	935	-0.0012
442	Ov	7	q	76634846	93623662	935	-0.0012
442	Ov	7	q	93625456	102389621	1359	0.1406
442	Ov	7	q	93625456	102389621	1359	0.1406
442	Ov	7	q	102389943	127026098	1304	0.0146
442	Ov	7	q	102389943	127026098	1304	0.0146
442	Ov	7	q	127031421	159025864	3092	0.1319
442	Ov	7	q	127031421	159025864	3092	0.1319
442	Ov	8	p	182714	31497895	2037	-0.615
442	Ov	8	p	182714	31497895	2037	-0.615
442	Ov	8	p	32406155	43211930	845	0.072
442	Ov	8	p	32406155	43211930	845	0.072
442	Ov	8	q	47752736	133856385	3841	0.046
442	Ov	8	q	47752736	133856385	3841	0.046
442	Ov	8	q	133857989	146279334	1144	0.1728
442	Ov	8	q	133857989	146279334	1144	0.1728
442	Ov	9	p	154731	44175608	2238	0.061
442	Ov	9	p	154731	44175608	2238	0.061
442	Ov	9	q	65602571	127693569	4032	-0.6036
442	Ov	9	q	65602571	127693569	4032	-0.6036
442	Ov	9	q	127700821	141071660	2882	0.2264
442	Ov	9	q	127700821	141071660	2882	0.2264
442	Ov	10	p	95123	38740338	2321	0.0069
442	Ov	10	p	95123	38740338	2321	0.0069
442	Ov	10	q	42379858	87966308	2586	-0.0345
442	Ov	10	q	42379858	87966308	2586	-0.0345
442	Ov	10	q	88024397	127530305	3871	-0.2332
442	Ov	10	q	88024397	127530305	3871	-0.2332
442	Ov	10	q	127540909	135473026	630	0.3158
442	Ov	10	q	127540909	135473026	630	0.3158
442	Ov	11	p	193052	47611785	4291	0.0859
442	Ov	11	p	193052	47611785	4291	0.0859
442	Ov	11	p	47640340	51527614	247	-0.0568
442	Ov	11	p	47640340	51527614	247	-0.0568
442	Ov	11	q	55035776	55861360	59	-0.0008
442	Ov	11	q	55035776	55861360	59	-0.0008
442	Ov	11	q	55872509	58207463	298	-0.5697
442	Ov	11	q	55872509	58207463	298	-0.5697
442	Ov	11	q	58274597	58480183	39	0.1551
442	Ov	11	q	58274597	58480183	39	0.1551
442	Ov	11	q	58482800	58920082	27	-0.5957
442	Ov	11	q	58482800	58920082	27	-0.5957
442	Ov	11	q	58940051	59665907	114	0.1763
442	Ov	11	q	58940051	59665907	114	0.1763
442	Ov	11	q	59705862	59997294	39	-0.8588
442	Ov	11	q	59705862	59997294	39	-0.8588
442	Ov	11	q	60048123	64127765	1075	0.1283
442	Ov	11	q	60048123	64127765	1075	0.1283
442	Ov	11	q	64128523	66483399	962	0.2666
442	Ov	11	q	64128523	66483399	962	0.2666
442	Ov	11	q	66488471	82535930	1752	0.163
442	Ov	11	q	66488471	82535930	1752	0.163
442	Ov	11	q	82549478	112131063	1729	0.0057
442	Ov	11	q	82549478	112131063	1729	0.0057
442	Ov	11	q	112832101	131530753	2016	0.1124
442	Ov	11	q	112832101	131530753	2016	0.1124
442	Ov	11	q	131781462	134856553	173	-0.6387
442	Ov	11	q	131781462	134856553	173	-0.6387
442	Ov	12	p	176061	7883408	1287	0.1701
442	Ov	12	p	176061	7883408	1287	0.1701
442	Ov	12	p	7889948	34182457	2130	0.0103
442	Ov	12	p	7889948	34182457	2130	0.0103
442	Ov	12	q	38710667	44781804	462	-0.0483
442	Ov	12	q	38710667	44781804	462	-0.0483
442	Ov	12	q	44902619	58335536	3118	0.1231
442	Ov	12	q	44902619	58335536	3118	0.1231
442	Ov	12	q	58339390	108138271	3025	0.0253
442	Ov	12	q	58339390	108138271	3025	0.0253
442	Ov	12	q	108140010	133810733	3128	0.1906
442	Ov	12	q	108140010	133810733	3128	0.1906
442	Ov	13	q	19600475	48807472	1948	-0.656
442	Ov	13	q	19600475	48807472	1948	-0.656
442	Ov	13	q	48827882	48985563	22	-2.2388
442	Ov	13	q	48827882	48985563	22	-2.2388
442	Ov	13	q	49027125	115089307	2187	-0.5956
442	Ov	13	q	49027125	115089307	2187	-0.5956
442	Ov	14	q	19685131	30132968	1482	0.0228
442	Ov	14	q	19685131	30132968	1482	0.0228
442	Ov	14	q	30135225	60712546	1877	-0.0975
442	Ov	14	q	30135225	60712546	1877	-0.0975
442	Ov	14	q	60743699	107283041	4311	0.0119
442	Ov	14	q	60743699	107283041	4311	0.0119
442	Ov	15	q	20169987	43094343	2111	0.0883
442	Ov	15	q	20169987	43094343	2111	0.0883
442	Ov	15	q	43102786	62360393	2092	0.0011
442	Ov	15	q	43102786	62360393	2092	0.0011
442	Ov	15	q	62360731	102462753	3893	0.1127
442	Ov	15	q	62360731	102462753	3893	0.1127
442	Ov	16	p	81704	34682162	4738	0.1576
442	Ov	16	p	81704	34682162	4738	0.1576
442	Ov	16	q	46508169	90161152	4482	0.0733
442	Ov	16	q	46508169	90161152	4482	0.0733
442	Ov	17	p	6004	22066769	3802	-0.5279
442	Ov	17	p	6004	22066769	3802	-0.5279
442	Ov	17	q	25620838	29509521	789	-0.5997
442	Ov	17	q	25620838	29509521	789	-0.5997
442	Ov	17	q	29527419	29661870	44	-2.421
442	Ov	17	q	29527419	29661870	44	-2.421
442	Ov	17	q	29663336	33984602	457	-0.6453
442	Ov	17	q	29663336	33984602	457	-0.6453
442	Ov	17	q	33997794	43679170	2444	0.128
442	Ov	17	q	33997794	43679170	2444	0.128
442	Ov	17	q	43679267	45810818	250	-0.0219
442	Ov	17	q	43679267	45810818	250	-0.0219
442	Ov	17	q	45819926	71253747	2799	0.1859
442	Ov	17	q	45819926	71253747	2799	0.1859
442	Ov	17	q	71256955	81083496	2253	0.3525
442	Ov	17	q	71256955	81083496	2253	0.3525
442	Ov	18	p	116845	15005846	1030	-0.0294
442	Ov	18	p	116845	15005846	1030	-0.0294
442	Ov	18	q	18531243	30672637	729	-0.0842
442	Ov	18	q	18531243	30672637	729	-0.0842
442	Ov	18	q	30791837	32461994	78	-0.8293
442	Ov	18	q	30791837	32461994	78	-0.8293
442	Ov	18	q	32464616	78005105	1836	-0.0164
442	Ov	18	q	32464616	78005105	1836	-0.0164
442	Ov	19	p	107094	1222976	388	-0.6256
442	Ov	19	p	107094	1222976	388	-0.6256
442	Ov	19	p	1226439	11725624	3030	-0.2599
442	Ov	19	p	1226439	11725624	3030	-0.2599
442	Ov	19	p	11727481	12692235	250	-0.5078
442	Ov	19	p	11727481	12692235	250	-0.5078
442	Ov	19	p	12693563	13260888	248	-0.2721
442	Ov	19	p	12693563	13260888	248	-0.2721
442	Ov	19	p	13263943	18248060	1316	-0.0618
442	Ov	19	p	13263943	18248060	1316	-0.0618
442	Ov	19	p	18249800	24345032	862	-0.5227
442	Ov	19	p	18249800	24345032	862	-0.5227
442	Ov	19	q	29567063	38573355	1248	-0.5947
442	Ov	19	q	29567063	38573355	1248	-0.5947
442	Ov	19	q	38573525	52443896	4038	-0.4794
442	Ov	19	q	38573525	52443896	4038	-0.4794
442	Ov	19	q	52447329	54251879	442	-0.6663
442	Ov	19	q	52447329	54251879	442	-0.6663
442	Ov	19	q	54254551	59083797	1428	-0.514
442	Ov	19	q	54254551	59083797	1428	-0.514
442	Ov	20	p	68260	26188891	1763	0.1094
442	Ov	20	p	68260	26188891	1763	0.1094
442	Ov	20	q	29625845	62959197	3819	0.1538
442	Ov	20	q	29625845	62959197	3819	0.1538
442	Ov	21	p	9825764	9907174	4	-1.6384
442	Ov	21	p	9825764	9907174	4	-1.6384
442	Ov	21	p	9908284	11098633	32	-0.0562
442	Ov	21	p	9908284	11098633	32	-0.0562
442	Ov	21	q	14745307	16031035	76	-0.7811
442	Ov	21	q	14745307	16031035	76	-0.7811
442	Ov	21	q	16337016	20058281	106	0.0178
442	Ov	21	q	16337016	20058281	106	0.0178
442	Ov	21	q	22370838	27141425	68	-0.7326
442	Ov	21	q	22370838	27141425	68	-0.7326
442	Ov	21	q	27253902	31023394	173	0.3898
442	Ov	21	q	27253902	31023394	173	0.3898
442	Ov	21	q	31027033	32185303	59	-0.3474
442	Ov	21	q	31027033	32185303	59	-0.3474
442	Ov	21	q	32201796	38884438	705	0.4401
442	Ov	21	q	32201796	38884438	705	0.4401
442	Ov	21	q	38997389	40978152	134	-0.0406
442	Ov	21	q	38997389	40978152	134	-0.0406
442	Ov	21	q	40981404	48084180	1121	0.1869
442	Ov	21	q	40981404	48084180	1121	0.1869
442	Ov	22	q	16157526	51220584	5002	-0.5142
442	Ov	22	q	16157526	51220584	5002	-0.5142
442	Ov	23	p	2699993	12838732	385	-0.5462
442	Ov	23	p	2699993	12838732	385	-0.5462
442	Ov	23	p	12840762	46887291	1667	-0.7473
442	Ov	23	p	12840762	46887291	1667	-0.7473
442	Ov	23	p	46893003	56592032	1132	-0.6312
442	Ov	23	p	46893003	56592032	1132	-0.6312
442	Ov	23	p	57010746	57936608	28	0.3095
442	Ov	23	p	57010746	57936608	28	0.3095
442	Ov	23	q	62519303	70598758	526	0.5104
442	Ov	23	q	62519303	70598758	526	0.5104
442	Ov	23	q	70601684	154774733	4006	0.414
442	Ov	23	q	70601684	154774733	4006	0.414
442	STIC	1	p	65832	1634935	415	-0.214
442	STIC	1	p	65832	1634935	415	-0.214
442	STIC	1	p	65832	1634935	415	-0.214
442	STIC	1	p	1635173	23636999	3133	-0.5009
442	STIC	1	p	1635173	23636999	3133	-0.5009
442	STIC	1	p	1635173	23636999	3133	-0.5009
442	STIC	1	p	23637254	35135140	1690	-0.2658
442	STIC	1	p	23637254	35135140	1690	-0.2658
442	STIC	1	p	23637254	35135140	1690	-0.2658
442	STIC	1	p	35183846	36499722	224	1.84
442	STIC	1	p	35183846	36499722	224	1.84
442	STIC	1	p	35183846	36499722	224	1.84
442	STIC	1	p	36501746	46867715	1655	1.031
442	STIC	1	p	36501746	46867715	1655	1.031
442	STIC	1	p	36501746	46867715	1655	1.031
442	STIC	1	p	46870599	54871522	824	0.8237
442	STIC	1	p	46870599	54871522	824	0.8237
442	STIC	1	p	46870599	54871522	824	0.8237
442	STIC	1	p	55013919	121310476	4348	0.2523
442	STIC	1	p	55013919	121310476	4348	0.2523
442	STIC	1	p	55013919	121310476	4348	0.2523
442	STIC	1	q	144013835	152060390	988	0.5425
442	STIC	1	q	144013835	152060390	988	0.5425
442	STIC	1	q	152079784	152382065	88	-1.1054
442	STIC	1	q	152079784	152382065	88	-1.1054
442	STIC	1	q	152382561	153431462	86	-0.2895
442	STIC	1	q	152382561	153431462	86	-0.2895
442	STIC	1	q	153507090	156784876	1210	0.5796
442	STIC	1	q	153507090	156784876	1210	0.5796
442	STIC	1	q	156785538	159683356	433	-0.0599
442	STIC	1	q	156785538	159683356	433	-0.0599
442	STIC	1	q	159684103	161309247	489	0.4299
442	STIC	1	q	159684103	161309247	489	0.4299
442	STIC	1	q	161310418	201342223	2859	0.1837
442	STIC	1	q	161310418	201342223	2859	0.1837
442	STIC	1	q	201346639	207265100	1012	0.4905
442	STIC	1	q	201346639	207265100	1012	0.4905
442	STIC	1	q	207268612	236883431	2461	0.274
442	STIC	1	q	207268612	236883431	2461	0.274
442	STIC	1	q	236889203	243384988	361	-0.1414
442	STIC	1	q	236889203	243384988	361	-0.1414
442	STIC	1	q	243388432	247719781	336	0.2812
442	STIC	1	q	243388432	247719781	336	0.2812
442	STIC	1	q	247726777	248845228	118	-0.4894
442	STIC	1	q	247726777	248845228	118	-0.4894
442	STIC	1	q	248845483	249211066	26	0.7125
442	STIC	1	q	248845483	249211066	26	0.7125
442	STIC	2	p	41460	9022604	304	-0.0424
442	STIC	2	p	41460	9022604	304	-0.0424
442	STIC	2	p	9028089	89092459	5765	0.2366
442	STIC	2	p	9028089	89092459	5765	0.2366
442	STIC	2	p	89111784	91960853	108	-0.3797
442	STIC	2	p	89111784	91960853	108	-0.3797
442	STIC	2	q	95537299	162276604	3876	0.0947
442	STIC	2	q	95537299	162276604	3876	0.0947
442	STIC	2	q	162279830	170175373	611	-0.2436
442	STIC	2	q	162279830	170175373	611	-0.2436
442	STIC	2	q	170177204	178704882	738	0.1652
442	STIC	2	q	170177204	178704882	738	0.1652
442	STIC	2	q	178740496	179664255	357	-0.6331
442	STIC	2	q	178740496	179664255	357	-0.6331
442	STIC	2	q	179665066	217332656	2597	-0.009
442	STIC	2	q	179665066	217332656	2597	-0.009
442	STIC	2	q	217340009	223536486	816	0.2054
442	STIC	2	q	217340009	223536486	816	0.2054
442	STIC	2	q	223552996	231267565	522	-0.2327
442	STIC	2	q	223552996	231267565	522	-0.2327
442	STIC	2	q	231280979	243037046	1561	0.0599
442	STIC	2	q	231280979	243037046	1561	0.0599
442	STIC	3	p	239351	48684235	3765	0.0506
442	STIC	3	p	239351	48684235	3765	0.0506
442	STIC	3	p	48685269	50402061	612	0.2915
442	STIC	3	p	48685269	50402061	612	0.2915
442	STIC	3	p	50402498	90283547	2068	0.0057
442	STIC	3	p	50402498	90283547	2068	0.0057
442	STIC	3	q	93593119	127379410	2299	-0.0358
442	STIC	3	q	93593119	127379410	2299	-0.0358
442	STIC	3	q	127381030	130092449	324	0.2683
442	STIC	3	q	127381030	130092449	324	0.2683
442	STIC	3	q	130095045	130383839	82	-0.657
442	STIC	3	q	130095045	130383839	82	-0.657
442	STIC	3	q	130394093	197765390	4293	0.1068
442	STIC	3	q	130394093	197765390	4293	0.1068
442	STIC	4	p	53239	22694605	1682	0.0081
442	STIC	4	p	53239	22694605	1682	0.0081
442	STIC	4	p	22715680	49063825	1117	-0.4171
442	STIC	4	p	22715680	49063825	1117	-0.4171
442	STIC	4	q	52709329	86491746	1946	-0.3859
442	STIC	4	q	52709329	86491746	1946	-0.3859
442	STIC	4	q	86642988	87809268	86	-1.2148
442	STIC	4	q	86642988	87809268	86	-1.2148
442	STIC	4	q	87811216	190947898	4309	-0.3836
442	STIC	4	q	87811216	190947898	4309	-0.3836
442	STIC	5	p	140385	45696008	2098	-0.2008
442	STIC	5	p	140385	45696008	2098	-0.2008
442	STIC	5	q	49695036	180687068	8288	-0.117
442	STIC	5	q	49695036	180687068	8288	-0.117
442	STIC	6	p	203389	36590220	2330	0.6772
442	STIC	6	p	203389	36590220	2330	0.6772
442	STIC	6	p	36645511	47646684	1458	0.2133
442	STIC	6	p	36645511	47646684	1458	0.2133
442	STIC	6	p	47647806	58287628	672	-0.1992
442	STIC	6	p	47647806	58287628	672	-0.1992
442	STIC	6	q	62390794	74149924	398	-0.2554
442	STIC	6	q	62390794	74149924	398	-0.2554
442	STIC	6	q	74155318	170893399	5414	0.0578
442	STIC	6	q	74155318	170893399	5414	0.0578
442	STIC	7	p	193221	57529548	3765	0.1438
442	STIC	7	p	193221	57529548	3765	0.1438
442	STIC	7	q	62758725	72286044	306	0.0939
442	STIC	7	q	62758725	72286044	306	0.0939
442	STIC	7	q	72296702	77365749	674	0.4267
442	STIC	7	q	72296702	77365749	674	0.4267
442	STIC	7	q	77378805	87214835	402	-0.1112
442	STIC	7	q	77378805	87214835	402	-0.1112
442	STIC	7	q	87224964	100674325	1551	0.2491
442	STIC	7	q	87224964	100674325	1551	0.2491
442	STIC	7	q	100674848	100685892	36	-1.3392
442	STIC	7	q	100674848	100685892	36	-1.3392
442	STIC	7	q	100691170	141450155	2934	0.1672
442	STIC	7	q	100691170	141450155	2934	0.1672
442	STIC	7	q	141463988	142378629	222	-0.3088
442	STIC	7	q	141463988	142378629	222	-0.3088
442	STIC	7	q	142423227	159025864	1456	0.1787
442	STIC	7	q	142423227	159025864	1456	0.1787
442	STIC	8	p	182714	3165184	196	-0.2944
442	STIC	8	p	182714	3165184	196	-0.2944
442	STIC	8	p	3165869	43211930	2686	0.09
442	STIC	8	p	3165869	43211930	2686	0.09
442	STIC	8	q	47752736	144557595	4468	0.1145
442	STIC	8	q	47752736	144557595	4468	0.1145
442	STIC	8	q	144566973	146279334	517	0.3932
442	STIC	8	q	144566973	146279334	517	0.3932
442	STIC	9	p	154731	44175608	2238	0.0575
442	STIC	9	p	154731	44175608	2238	0.0575
442	STIC	9	q	65602571	127693569	4032	-0.5623
442	STIC	9	q	65602571	127693569	4032	-0.5623
442	STIC	9	q	127700821	136344029	1709	0.2051
442	STIC	9	q	127700821	136344029	1709	0.2051
442	STIC	9	q	136379762	138716591	353	-0.2359
442	STIC	9	q	136379762	138716591	353	-0.2359
442	STIC	9	q	138719182	141071660	820	0.2366
442	STIC	9	q	138719182	141071660	820	0.2366
442	STIC	10	p	95123	38740338	2321	0.0105
442	STIC	10	p	95123	38740338	2321	0.0105
442	STIC	10	q	42379858	56288050	691	-0.2698
442	STIC	10	q	42379858	56288050	691	-0.2698
442	STIC	10	q	56335071	127522340	5759	0.0626
442	STIC	10	q	56335071	127522340	5759	0.0626
442	STIC	10	q	127524645	135473026	637	-0.2239
442	STIC	10	q	127524645	135473026	637	-0.2239
442	STIC	11	p	193052	869762	312	0.3998
442	STIC	11	p	193052	869762	312	0.3998
442	STIC	11	p	870100	1502362	254	-0.1938
442	STIC	11	p	870100	1502362	254	-0.1938
442	STIC	11	p	1507609	4133160	410	0.2601
442	STIC	11	p	1507609	4133160	410	0.2601
442	STIC	11	p	4139561	6238926	273	-0.5132
442	STIC	11	p	4139561	6238926	273	-0.5132
442	STIC	11	p	6239264	6704370	167	0.1223
442	STIC	11	p	6239264	6704370	167	0.1223
442	STIC	11	p	6735805	7488008	67	-0.745
442	STIC	11	p	6735805	7488008	67	-0.745
442	STIC	11	p	7507120	17373389	902	0.2015
442	STIC	11	p	7507120	17373389	902	0.2015
442	STIC	11	p	17378152	31443467	797	-0.1266
442	STIC	11	p	17378152	31443467	797	-0.1266
442	STIC	11	p	31447740	48175321	1220	0.2003
442	STIC	11	p	31447740	48175321	1220	0.2003
442	STIC	11	p	48177331	51527614	136	-0.5611
442	STIC	11	p	48177331	51527614	136	-0.5611
442	STIC	11	q	55035776	57003337	145	-0.8712
442	STIC	11	q	55035776	57003337	145	-0.8712
442	STIC	11	q	57004037	57576769	167	0.2877
442	STIC	11	q	57004037	57576769	167	0.2877
442	STIC	11	q	57577542	60642976	366	-0.2922
442	STIC	11	q	57577542	60642976	366	-0.2922
442	STIC	11	q	60658128	62339119	430	0.2396
442	STIC	11	q	60658128	62339119	430	0.2396
442	STIC	11	q	62339340	62656037	203	0.6636
442	STIC	11	q	62339340	62656037	203	0.6636
442	STIC	11	q	62677157	63177237	69	-0.351
442	STIC	11	q	62677157	63177237	69	-0.351
442	STIC	11	q	63230863	67810835	1536	0.4954
442	STIC	11	q	63230863	67810835	1536	0.4954
442	STIC	11	q	67810959	76709722	1172	0.2527
442	STIC	11	q	67810959	76709722	1172	0.2527
442	STIC	11	q	76725983	107535749	1539	0.0261
442	STIC	11	q	76725983	107535749	1539	0.0261
442	STIC	11	q	107578560	123600384	1762	0.2552
442	STIC	11	q	107578560	123600384	1762	0.2552
442	STIC	11	q	123601216	124481457	99	-0.6516
442	STIC	11	q	123601216	124481457	99	-0.6516
442	STIC	11	q	124482889	134856553	795	0.0818
442	STIC	11	q	124482889	134856553	795	0.0818
442	STIC	12	p	176061	1940054	236	0.2905
442	STIC	12	p	176061	1940054	236	0.2905
442	STIC	12	p	1940506	6080775	421	-0.1098
442	STIC	12	p	1940506	6080775	421	-0.1098
442	STIC	12	p	6085301	7360567	550	0.4825
442	STIC	12	p	6085301	7360567	550	0.4825
442	STIC	12	p	7361077	11548368	730	-0.0698
442	STIC	12	p	7361077	11548368	730	-0.0698
442	STIC	12	p	11802948	34182457	1480	0.175
442	STIC	12	p	11802948	34182457	1480	0.175
442	STIC	12	q	38710667	41967396	326	-0.3157
442	STIC	12	q	38710667	41967396	326	-0.3157
442	STIC	12	q	42481691	55356277	2183	0.2668
442	STIC	12	q	42481691	55356277	2183	0.2668
442	STIC	12	q	55356621	56075532	64	-0.7715
442	STIC	12	q	55356621	56075532	64	-0.7715
442	STIC	12	q	56077555	58339390	1008	0.3659
442	STIC	12	q	56077555	58339390	1008	0.3659
442	STIC	12	q	58340715	133810733	6152	0.0697
442	STIC	12	q	58340715	133810733	6152	0.0697
442	STIC	13	q	19600475	115089307	4157	-0.545
442	STIC	13	q	19600475	115089307	4157	-0.545
442	STIC	14	q	19685131	20711333	49	-0.9107
442	STIC	14	q	19685131	20711333	49	-0.9107
442	STIC	14	q	20757803	100934388	6556	0.074
442	STIC	14	q	20757803	100934388	6556	0.074
442	STIC	14	q	100950326	102027825	126	-0.5864
442	STIC	14	q	100950326	102027825	126	-0.5864
442	STIC	14	q	102196704	106053234	763	0.0679
442	STIC	14	q	102196704	106053234	763	0.0679
442	STIC	14	q	106053492	107283041	176	-0.576
442	STIC	14	q	106053492	107283041	176	-0.576
442	STIC	15	q	20169987	25415793	231	-0.4275
442	STIC	15	q	20169987	25415793	231	-0.4275
442	STIC	15	q	25417865	25496088	41	-1.4094
442	STIC	15	q	25417865	25496088	41	-1.4094
442	STIC	15	q	25514841	34295182	591	-0.2478
442	STIC	15	q	25514841	34295182	591	-0.2478
442	STIC	15	q	34330929	102462753	7233	0.1032
442	STIC	15	q	34330929	102462753	7233	0.1032
442	STIC	16	p	81704	16349512	2488	0.3042
442	STIC	16	p	81704	16349512	2488	0.3042
442	STIC	16	p	16349955	28133000	1197	-0.0474
442	STIC	16	p	16349955	28133000	1197	-0.0474
442	STIC	16	p	28137047	31226029	791	0.4473
442	STIC	16	p	28137047	31226029	791	0.4473
442	STIC	16	p	31228095	34682162	262	-0.1396
442	STIC	16	p	31228095	34682162	262	-0.1396
442	STIC	16	q	46508169	59772751	1360	0.1196
442	STIC	16	q	46508169	59772751	1360	0.1196
442	STIC	16	q	59773685	65397074	38	-0.7359
442	STIC	16	q	59773685	65397074	38	-0.7359
442	STIC	16	q	65830922	70154492	874	0.3314
442	STIC	16	q	65830922	70154492	874	0.3314
442	STIC	16	q	70161182	90161152	2210	0.1373
442	STIC	16	q	70161182	90161152	2210	0.1373
442	STIC	17	p	6004	2930258	493	-0.1522
442	STIC	17	p	6004	2930258	493	-0.1522
442	STIC	17	p	2934149	3526623	97	-0.936
442	STIC	17	p	2934149	3526623	97	-0.936
442	STIC	17	p	3527343	6515187	736	-0.3468
442	STIC	17	p	3527343	6515187	736	-0.3468
442	STIC	17	p	6524063	8151216	737	-0.0195
442	STIC	17	p	6524063	8151216	737	-0.0195
442	STIC	17	p	8157218	10210301	263	-0.4688
442	STIC	17	p	8157218	10210301	263	-0.4688
442	STIC	17	p	10212590	11881259	348	-1.0658
442	STIC	17	p	10212590	11881259	348	-1.0658
442	STIC	17	p	11881713	22066769	1128	-0.4016
442	STIC	17	p	11881713	22066769	1128	-0.4016
442	STIC	17	q	25620838	29509521	789	-0.2947
442	STIC	17	q	25620838	29509521	789	-0.2947
442	STIC	17	q	29527419	29661870	44	-1.9042
442	STIC	17	q	29527419	29661870	44	-1.9042
442	STIC	17	q	29663336	35956260	764	-0.4711
442	STIC	17	q	29663336	35956260	764	-0.4711
442	STIC	17	q	35960397	49374327	3176	-0.2426
442	STIC	17	q	35960397	49374327	3176	-0.2426
442	STIC	17	q	49375003	72955912	2288	-0.4683
442	STIC	17	q	49375003	72955912	2288	-0.4683
442	STIC	17	q	72957877	81083496	1975	-0.2491
442	STIC	17	q	72957877	81083496	1975	-0.2491
442	STIC	18	p	116845	15005846	1030	-0.0313
442	STIC	18	p	116845	15005846	1030	-0.0313
442	STIC	18	q	18531243	30913121	741	0.0439
442	STIC	18	q	18531243	30913121	741	0.0439
442	STIC	18	q	30926178	32464616	67	-0.9581
442	STIC	18	q	30926178	32464616	67	-0.9581
442	STIC	18	q	32470286	78005105	1835	-0.0066
442	STIC	18	q	32470286	78005105	1835	-0.0066
442	STIC	19	p	107094	1510694	517	0.4056
442	STIC	19	p	107094	1510694	517	0.4056
442	STIC	19	p	1511489	8669948	1956	0.1069
442	STIC	19	p	1511489	8669948	1956	0.1069
442	STIC	19	p	8670426	10169612	373	-0.2279
442	STIC	19	p	8670426	10169612	373	-0.2279
442	STIC	19	p	10192328	11657640	561	0.2068
442	STIC	19	p	10192328	11657640	561	0.2068
442	STIC	19	p	11658607	12694168	263	-0.2047
442	STIC	19	p	11658607	12694168	263	-0.2047
442	STIC	19	p	12707917	14682713	557	0.2906
442	STIC	19	p	12707917	14682713	557	0.2906
442	STIC	19	p	14693869	15228655	133	-0.4788
442	STIC	19	p	14693869	15228655	133	-0.4788
442	STIC	19	p	15229984	22153455	1581	0.066
442	STIC	19	p	15229984	22153455	1581	0.066
442	STIC	19	p	22154930	24345032	153	-0.4743
442	STIC	19	p	22154930	24345032	153	-0.4743
442	STIC	19	q	29567063	36643144	951	0.1352
442	STIC	19	q	29567063	36643144	951	0.1352
442	STIC	19	q	36673361	39805576	742	-0.0956
442	STIC	19	q	36673361	39805576	742	-0.0956
442	STIC	19	q	39819006	40030580	105	0.6022
442	STIC	19	q	39819006	40030580	105	0.6022
442	STIC	19	q	40093165	44319746	1042	-0.3015
442	STIC	19	q	40093165	44319746	1042	-0.3015
442	STIC	19	q	44335467	44977277	188	-0.7716
442	STIC	19	q	44335467	44977277	188	-0.7716
442	STIC	19	q	44980588	48821710	960	-0.1794
442	STIC	19	q	44980588	48821710	960	-0.1794
442	STIC	19	q	48823453	50435638	727	0.1244
442	STIC	19	q	48823453	50435638	727	0.1244
442	STIC	19	q	50435921	51607615	368	-0.1759
442	STIC	19	q	50435921	51607615	368	-0.1759
442	STIC	19	q	51628192	54579023	714	-0.5876
442	STIC	19	q	51628192	54579023	714	-0.5876
442	STIC	19	q	54579347	54726375	93	0.1193
442	STIC	19	q	54579347	54726375	93	0.1193
442	STIC	19	q	54726654	55560010	288	-0.5549
442	STIC	19	q	54726654	55560010	288	-0.5549
442	STIC	19	q	55568018	56241300	302	0.0496
442	STIC	19	q	55568018	56241300	302	0.0496
442	STIC	19	q	56243318	56572781	81	-1.1535
442	STIC	19	q	56243318	56572781	81	-1.1535
442	STIC	19	q	56599433	59083797	595	-0.231
442	STIC	19	q	56599433	59083797	595	-0.231
442	STIC	20	p	68260	26188891	1763	0.1479
442	STIC	20	p	68260	26188891	1763	0.1479
442	STIC	20	q	29625845	62959197	3819	0.2799
442	STIC	20	q	29625845	62959197	3819	0.2799
442	STIC	21	p	9825764	11098633	36	-0.6439
442	STIC	21	p	9825764	11098633	36	-0.6439
442	STIC	21	q	14745307	27097457	234	-0.7155
442	STIC	21	q	14745307	27097457	234	-0.7155
442	STIC	21	q	27097582	31233907	194	0.0079
442	STIC	21	q	27097582	31233907	194	0.0079
442	STIC	21	q	31311665	32410709	60	-1.3295
442	STIC	21	q	31311665	32410709	60	-1.3295
442	STIC	21	q	32433443	38884438	699	0.3508
442	STIC	21	q	32433443	38884438	699	0.3508
442	STIC	21	q	38997389	48084180	1255	-0.0067
442	STIC	21	q	38997389	48084180	1255	-0.0067
442	STIC	22	q	16157526	37876701	2827	-0.4861
442	STIC	22	q	16157526	37876701	2827	-0.4861
442	STIC	22	q	37881951	43558846	1216	-0.2648
442	STIC	22	q	37881951	43558846	1216	-0.2648
442	STIC	22	q	43563141	51220584	959	-0.5162
442	STIC	22	q	43563141	51220584	959	-0.5162
442	STIC	23	p	2699993	24227098	1210	-0.287
442	STIC	23	p	2699993	24227098	1210	-0.287
442	STIC	23	p	24228257	37285091	373	-0.6987
442	STIC	23	p	24228257	37285091	373	-0.6987
442	STIC	23	p	37299997	57936608	1629	-0.248
442	STIC	23	p	37299997	57936608	1629	-0.248
442	STIC	23	q	62519303	154774733	4532	-0.3294
442	STIC	23	q	62519303	154774733	4532	-0.3294
451	FT	1	p	65832	1403905	302	0.3199
451	FT	1	p	65832	1403905	302	0.3199
451	FT	1	p	1407242	26317108	3662	0.1071
451	FT	1	p	1407242	26317108	3662	0.1071
451	FT	1	p	26349109	33945175	1183	0.2089
451	FT	1	p	26349109	33945175	1183	0.2089
451	FT	1	p	33954009	35135140	97	-0.1353
451	FT	1	p	33954009	35135140	97	-0.1353
451	FT	1	p	35183846	48459865	2066	0.3142
451	FT	1	p	35183846	48459865	2066	0.3142
451	FT	1	p	48462266	52810578	284	0.0275
451	FT	1	p	48462266	52810578	284	0.0275
451	FT	1	p	52811815	55680605	549	0.328
451	FT	1	p	52811815	55680605	549	0.328
451	FT	1	p	55691257	71546521	888	-0.5216
451	FT	1	p	55691257	71546521	888	-0.5216
451	FT	1	p	71873106	75868132	126	-0.881
451	FT	1	p	71873106	75868132	126	-0.881
451	FT	1	p	76007062	93257884	997	-0.5662
451	FT	1	p	76007062	93257884	997	-0.5662
451	FT	1	p	93297630	95609517	258	-0.2743
451	FT	1	p	93297630	95609517	258	-0.2743
451	FT	1	p	95614180	103496620	344	-0.6763
451	FT	1	p	95614180	103496620	344	-0.6763
451	FT	1	p	103540211	109607143	209	0.1416
451	FT	1	p	103540211	109607143	209	0.1416
451	FT	1	p	109608719	111060405	345	0.3773
451	FT	1	p	109608719	111060405	345	0.3773
451	FT	1	p	111060747	121310476	973	0.1519
451	FT	1	p	111060747	121310476	973	0.1519
451	FT	1	q	144013835	152009239	979	0.1282
451	FT	1	q	144013835	152009239	979	0.1282
451	FT	1	q	152056513	153431462	181	-0.2535
451	FT	1	q	152056513	153431462	181	-0.2535
451	FT	1	q	153507090	156900229	1277	0.222
451	FT	1	q	153507090	156900229	1277	0.222
451	FT	1	q	156901618	158153790	169	-0.0788
451	FT	1	q	156901618	158153790	169	-0.0788
451	FT	1	q	158224425	159684225	199	-0.5153
451	FT	1	q	158224425	159684225	199	-0.5153
451	FT	1	q	159750873	160261575	193	0.22
451	FT	1	q	159750873	160261575	193	0.22
451	FT	1	q	160262212	160924153	130	-0.1938
451	FT	1	q	160262212	160924153	130	-0.1938
451	FT	1	q	160924397	161173197	113	0.3648
451	FT	1	q	160924397	161173197	113	0.3648
451	FT	1	q	161176130	163325123	267	0.0142
451	FT	1	q	161176130	163325123	267	0.0142
451	FT	1	q	164529112	169521761	385	0.3558
451	FT	1	q	164529112	169521761	385	0.3558
451	FT	1	q	169524426	171607651	242	0.1183
451	FT	1	q	169524426	171607651	242	0.1183
451	FT	1	q	171621083	173873026	197	0.4878
451	FT	1	q	171621083	173873026	197	0.4878
451	FT	1	q	173876544	182908309	730	0.2591
451	FT	1	q	173876544	182908309	730	0.2591
451	FT	1	q	182909446	184723538	192	0.5695
451	FT	1	q	182909446	184723538	192	0.5695
451	FT	1	q	184760050	200376126	671	0.2187
451	FT	1	q	184760050	200376126	671	0.2187
451	FT	1	q	200377409	210006497	1470	0.564
451	FT	1	q	200377409	210006497	1470	0.564
451	FT	1	q	210008419	215785152	348	0.1223
451	FT	1	q	210008419	215785152	348	0.1223
451	FT	1	q	215791412	217671740	100	-0.3209
451	FT	1	q	215791412	217671740	100	-0.3209
451	FT	1	q	217688114	236849931	1769	0.1987
451	FT	1	q	217688114	236849931	1769	0.1987
451	FT	1	q	236881075	243668510	394	-0.0902
451	FT	1	q	236881075	243668510	394	-0.0902
451	FT	1	q	243675632	247712389	306	0.1865
451	FT	1	q	243675632	247712389	306	0.1865
451	FT	1	q	247719658	248845483	120	-0.1603
451	FT	1	q	247719658	248845483	120	-0.1603
451	FT	1	q	248902944	249211066	25	0.4871
451	FT	1	q	248902944	249211066	25	0.4871
451	FT	2	p	41460	9114408	310	0.1206
451	FT	2	p	41460	9114408	310	0.1206
451	FT	2	p	9143639	11605840	297	0.3987
451	FT	2	p	9143639	11605840	297	0.3987
451	FT	2	p	11680652	25181497	619	0.1216
451	FT	2	p	11680652	25181497	619	0.1216
451	FT	2	p	25186221	29379182	892	0.3479
451	FT	2	p	25186221	29379182	892	0.3479
451	FT	2	p	29380103	37353443	566	0.0514
451	FT	2	p	29380103	37353443	566	0.0514
451	FT	2	p	37362572	48757278	845	0.2412
451	FT	2	p	37362572	48757278	845	0.2412
451	FT	2	p	48807753	53992532	102	-0.1804
451	FT	2	p	48807753	53992532	102	-0.1804
451	FT	2	p	53994989	74185726	1534	0.1617
451	FT	2	p	53994989	74185726	1534	0.1617
451	FT	2	p	74229837	75937764	301	0.3982
451	FT	2	p	74229837	75937764	301	0.3982
451	FT	2	p	76975877	85043018	151	-0.0623
451	FT	2	p	76975877	85043018	151	-0.0623
451	FT	2	p	85046398	85999728	159	0.4114
451	FT	2	p	85046398	85999728	159	0.4114
451	FT	2	p	86008162	89185422	302	0.0901
451	FT	2	p	86008162	89185422	302	0.0901
451	FT	2	p	89185598	91960853	96	-0.2491
451	FT	2	p	89185598	91960853	96	-0.2491
451	FT	2	q	95537299	101869896	874	0.2112
451	FT	2	q	95537299	101869896	874	0.2112
451	FT	2	q	101874254	124783179	1179	-0.3191
451	FT	2	q	101874254	124783179	1179	-0.3191
451	FT	2	q	124979231	127656554	32	-1.0119
451	FT	2	q	124979231	127656554	32	-1.0119
451	FT	2	q	127657008	133539535	497	-0.2714
451	FT	2	q	127657008	133539535	497	-0.2714
451	FT	2	q	133539657	136956740	233	-0.5066
451	FT	2	q	133539657	136956740	233	-0.5066
451	FT	2	q	137639710	148700887	240	-0.7645
451	FT	2	q	137639710	148700887	240	-0.7645
451	FT	2	q	148705567	151343788	96	-0.1215
451	FT	2	q	148705567	151343788	96	-0.1215
451	FT	2	q	151857769	159537068	488	-0.4713
451	FT	2	q	151857769	159537068	488	-0.4713
451	FT	2	q	159651838	169038451	684	-0.1638
451	FT	2	q	159651838	169038451	684	-0.1638
451	FT	2	q	169103726	179391769	973	0.483
451	FT	2	q	169103726	179391769	973	0.483
451	FT	2	q	179392964	182398994	398	0.1575
451	FT	2	q	179392964	182398994	398	0.1575
451	FT	2	q	182399457	187713531	264	0.5229
451	FT	2	q	182399457	187713531	264	0.5229
451	FT	2	q	187713656	190044204	143	0.1105
451	FT	2	q	187713656	190044204	143	0.1105
451	FT	2	q	190306190	209271786	1579	0.4189
451	FT	2	q	190306190	209271786	1579	0.4189
451	FT	2	q	209292907	216811725	437	0.1527
451	FT	2	q	209292907	216811725	437	0.1527
451	FT	2	q	216860972	220521214	803	0.6163
451	FT	2	q	216860972	220521214	803	0.6163
451	FT	2	q	220586322	225449630	158	0.3382
451	FT	2	q	220586322	225449630	158	0.3382
451	FT	2	q	225630383	231407606	470	0.1128
451	FT	2	q	225630383	231407606	470	0.1128
451	FT	2	q	231589890	238303519	755	0.4597
451	FT	2	q	231589890	238303519	755	0.4597
451	FT	2	q	238305311	242375887	641	0.6781
451	FT	2	q	238305311	242375887	641	0.6781
451	FT	2	q	242380673	243037046	124	0.3157
451	FT	2	q	242380673	243037046	124	0.3157
451	FT	3	p	239351	8609044	273	0.7125
451	FT	3	p	239351	8609044	273	0.7125
451	FT	3	p	8661549	11374400	470	0.9936
451	FT	3	p	8661549	11374400	470	0.9936
451	FT	3	p	11382115	17056283	621	0.2153
451	FT	3	p	11382115	17056283	621	0.2153
451	FT	3	p	17077222	38674505	1053	-0.1258
451	FT	3	p	17077222	38674505	1053	-0.1258
451	FT	3	p	38738854	38988212	63	-0.53
451	FT	3	p	38738854	38988212	63	-0.53
451	FT	3	p	38991575	39541436	98	0.1791
451	FT	3	p	38991575	39541436	98	0.1791
451	FT	3	p	39543587	46718085	654	-0.1593
451	FT	3	p	39543587	46718085	654	-0.1593
451	FT	3	p	46719743	50683036	1200	0.1031
451	FT	3	p	46719743	50683036	1200	0.1031
451	FT	3	p	50683161	51969168	169	-0.2029
451	FT	3	p	50683161	51969168	169	-0.2029
451	FT	3	p	51969291	52492608	232	0.1784
451	FT	3	p	51969291	52492608	232	0.1784
451	FT	3	p	52504750	58620005	859	-0.052
451	FT	3	p	52504750	58620005	859	-0.052
451	FT	3	p	58622034	63819727	150	-0.406
451	FT	3	p	58622034	63819727	150	-0.406
451	FT	3	p	63820769	73112865	371	-0.1082
451	FT	3	p	63820769	73112865	371	-0.1082
451	FT	3	p	73113259	90283547	227	-0.3585
451	FT	3	p	73113259	90283547	227	-0.3585
451	FT	3	q	93593119	122471436	1722	-0.1635
451	FT	3	q	93593119	122471436	1722	-0.1635
451	FT	3	q	122474068	129810907	899	0.024
451	FT	3	q	122474068	129810907	899	0.024
451	FT	3	q	130092449	130442264	101	-0.4762
451	FT	3	q	130092449	130442264	101	-0.4762
451	FT	3	q	130447360	153970776	1523	-0.111
451	FT	3	q	130447360	153970776	1523	-0.111
451	FT	3	q	153972405	183822582	1434	0.3186
451	FT	3	q	153972405	183822582	1434	0.3186
451	FT	3	q	183823013	184428613	233	0.717
451	FT	3	q	183823013	184428613	233	0.717
451	FT	3	q	184542360	197765390	1083	0.4854
451	FT	3	q	184542360	197765390	1083	0.4854
451	FT	4	p	53239	8612934	1189	-0.1147
451	FT	4	p	53239	8612934	1189	-0.1147
451	FT	4	p	8613718	20258264	397	-0.3443
451	FT	4	p	8613718	20258264	397	-0.3443
451	FT	4	p	20259422	36083759	360	-0.9437
451	FT	4	p	20259422	36083759	360	-0.9437
451	FT	4	p	36084905	49063825	852	-0.6435
451	FT	4	p	36084905	49063825	852	-0.6435
451	FT	4	q	52709329	53497225	54	-1.1404
451	FT	4	q	52709329	53497225	54	-1.1404
451	FT	4	q	53522396	152643379	4759	-0.2563
451	FT	4	q	53522396	152643379	4759	-0.2563
451	FT	4	q	152679916	174309391	865	-0.0125
451	FT	4	q	152679916	174309391	865	-0.0125
451	FT	4	q	174310863	183714361	195	-0.4985
451	FT	4	q	174310863	183714361	195	-0.4985
451	FT	4	q	183717738	190947477	453	-0.2421
451	FT	4	q	183717738	190947477	453	-0.2421
451	FT	5	p	140385	1879601	333	0.519
451	FT	5	p	140385	1879601	333	0.519
451	FT	5	p	1879883	19612511	603	0.1706
451	FT	5	p	1879883	19612511	603	0.1706
451	FT	5	p	19721384	31317443	76	-0.4792
451	FT	5	p	19721384	31317443	76	-0.4792
451	FT	5	p	31317728	32602178	149	0.0929
451	FT	5	p	31317728	32602178	149	0.0929
451	FT	5	p	32689081	45696008	934	-0.156
451	FT	5	p	32689081	45696008	934	-0.156
451	FT	5	q	49695036	73338992	1278	-0.8283
451	FT	5	q	49695036	73338992	1278	-0.8283
451	FT	5	q	73930497	80168891	570	-0.4001
451	FT	5	q	73930497	80168891	570	-0.4001
451	FT	5	q	80171543	95297335	584	-0.5736
451	FT	5	q	80171543	95297335	584	-0.5736
451	FT	5	q	95414810	108704258	350	-0.9337
451	FT	5	q	95414810	108704258	350	-0.9337
451	FT	5	q	108713878	131546010	1013	-0.4623
451	FT	5	q	108713878	131546010	1013	-0.4623
451	FT	5	q	131549595	149495372	2094	-0.2796
451	FT	5	q	131549595	149495372	2094	-0.2796
451	FT	5	q	149497177	150035930	127	0.1312
451	FT	5	q	149497177	150035930	127	0.1312
451	FT	5	q	150036395	158522610	582	-0.9419
451	FT	5	q	150036395	158522610	582	-0.9419
451	FT	5	q	158523340	160212579	135	-0.4683
451	FT	5	q	158523340	160212579	135	-0.4683
451	FT	5	q	160721096	167182077	88	-1.2362
451	FT	5	q	160721096	167182077	88	-1.2362
451	FT	5	q	167303052	170736665	288	-0.6579
451	FT	5	q	167303052	170736665	288	-0.6579
451	FT	5	q	170737151	174940511	210	-0.3919
451	FT	5	q	170737151	174940511	210	-0.3919
451	FT	5	q	174943585	177580783	431	0.1561
451	FT	5	q	174943585	177580783	431	0.1561
451	FT	5	q	177612729	180687068	511	-0.4052
451	FT	5	q	177612729	180687068	511	-0.4052
451	FT	6	p	203389	7608962	428	-0.0917
451	FT	6	p	203389	7608962	428	-0.0917
451	FT	6	p	7727286	11005577	191	-0.3463
451	FT	6	p	7727286	11005577	191	-0.3463
451	FT	6	p	11010884	25926012	697	0.1183
451	FT	6	p	11010884	25926012	697	0.1183
451	FT	6	p	25966766	27861559	260	0.3477
451	FT	6	p	25966766	27861559	260	0.3477
451	FT	6	p	27879003	29704042	125	-0.0522
451	FT	6	p	27879003	29704042	125	-0.0522
451	FT	6	p	29855852	34007950	178	0.3594
451	FT	6	p	29855852	34007950	178	0.3594
451	FT	6	p	34008323	35479955	234	0.8538
451	FT	6	p	34008323	35479955	234	0.8538
451	FT	6	p	35480378	37452871	340	0.6312
451	FT	6	p	35480378	37452871	340	0.6312
451	FT	6	p	37467554	43320025	783	0.0852
451	FT	6	p	37467554	43320025	783	0.0852
451	FT	6	p	43322423	44310761	289	0.4417
451	FT	6	p	43322423	44310761	289	0.4417
451	FT	6	p	44310885	51900332	394	-0.0404
451	FT	6	p	44310885	51900332	394	-0.0404
451	FT	6	p	51907611	53794904	204	0.1906
451	FT	6	p	51907611	53794904	204	0.1906
451	FT	6	p	53847520	58287628	294	-0.1436
451	FT	6	p	53847520	58287628	294	-0.1436
451	FT	6	q	62390794	70098560	137	-0.2987
451	FT	6	q	62390794	70098560	137	-0.2987
451	FT	6	q	70385999	106649827	1615	-0.031
451	FT	6	q	70385999	106649827	1615	-0.031
451	FT	6	q	106695910	117037349	744	0.1212
451	FT	6	q	106695910	117037349	744	0.1212
451	FT	6	q	117043262	133091302	886	-0.0934
451	FT	6	q	117043262	133091302	886	-0.0934
451	FT	6	q	133091971	143816755	554	0.122
451	FT	6	q	133091971	143816755	554	0.122
451	FT	6	q	143816877	148058462	288	-0.1722
451	FT	6	q	143816877	148058462	288	-0.1722
451	FT	6	q	148593357	152453258	299	0.1854
451	FT	6	q	148593357	152453258	299	0.1854
451	FT	6	q	152454443	156275648	320	-0.0864
451	FT	6	q	152454443	156275648	320	-0.0864
451	FT	6	q	157099102	160455399	336	0.2636
451	FT	6	q	157099102	160455399	336	0.2636
451	FT	6	q	160461529	166307728	255	-0.1523
451	FT	6	q	160461529	166307728	255	-0.1523
451	FT	6	q	166401006	170893399	383	0.2279
451	FT	6	q	166401006	170893399	383	0.2279
451	FT	7	p	193221	6865661	963	-0.584
451	FT	7	p	193221	6865661	963	-0.584
451	FT	7	p	7106534	26685856	904	-0.9076
451	FT	7	p	7106534	26685856	904	-0.9076
451	FT	7	p	26685978	43601323	1003	-0.1289
451	FT	7	p	26685978	43601323	1003	-0.1289
451	FT	7	p	43622784	45216934	340	0.1228
451	FT	7	p	43622784	45216934	340	0.1228
451	FT	7	p	45222756	57529548	546	-0.1074
451	FT	7	p	45222756	57529548	546	-0.1074
451	FT	7	q	62758725	72286044	304	-0.1349
451	FT	7	q	62758725	72286044	304	-0.1349
451	FT	7	q	72296702	77394798	672	0.19
451	FT	7	q	72296702	77394798	672	0.19
451	FT	7	q	77397966	87445414	413	-0.3587
451	FT	7	q	77397966	87445414	413	-0.3587
451	FT	7	q	87459225	98647180	842	-0.1724
451	FT	7	q	87459225	98647180	842	-0.1724
451	FT	7	q	98648475	100547242	651	0.1121
451	FT	7	q	98648475	100547242	651	0.1121
451	FT	7	q	100549499	100699367	88	-0.3578
451	FT	7	q	100549499	100699367	88	-0.3578
451	FT	7	q	100701182	102417689	212	0.1602
451	FT	7	q	100701182	102417689	212	0.1602
451	FT	7	q	102427792	123119852	1200	-0.2041
451	FT	7	q	102427792	123119852	1200	-0.2041
451	FT	7	q	123136779	141450155	1511	0.2604
451	FT	7	q	123136779	141450155	1511	0.2604
451	FT	7	q	141463988	142013243	160	-0.1409
451	FT	7	q	141463988	142013243	160	-0.1409
451	FT	7	q	142020918	143533678	280	0.3235
451	FT	7	q	142020918	143533678	280	0.3235
451	FT	7	q	143549363	148544250	194	-0.0136
451	FT	7	q	143549363	148544250	194	-0.0136
451	FT	7	q	148638626	150644399	300	0.3579
451	FT	7	q	148638626	150644399	300	0.3579
451	FT	7	q	150644524	151432968	260	0.5799
451	FT	7	q	150644524	151432968	260	0.5799
451	FT	7	q	151478210	158738320	464	0.156
451	FT	7	q	151478210	158738320	464	0.156
451	FT	7	q	158823301	159025864	17	0.916
451	FT	7	q	158823301	159025864	17	0.916
451	FT	8	p	182714	2024248	111	0.2041
451	FT	8	p	182714	2024248	111	0.2041
451	FT	8	p	2026787	6500444	138	-0.1858
451	FT	8	p	2026787	6500444	138	-0.1858
451	FT	8	p	6566184	19677047	599	0.2439
451	FT	8	p	6566184	19677047	599	0.2439
451	FT	8	p	19677893	21893997	120	-0.2581
451	FT	8	p	19677893	21893997	120	-0.2581
451	FT	8	p	21894978	22969138	280	0.1388
451	FT	8	p	21894978	22969138	280	0.1388
451	FT	8	p	22972214	35093193	839	-0.2567
451	FT	8	p	22972214	35093193	839	-0.2567
451	FT	8	p	35401926	36925151	56	-0.7188
451	FT	8	p	35401926	36925151	56	-0.7188
451	FT	8	p	37333330	39694627	380	-0.0381
451	FT	8	p	37333330	39694627	380	-0.0381
451	FT	8	p	39695534	43211930	351	0.1824
451	FT	8	p	39695534	43211930	351	0.1824
451	FT	8	q	47752736	49643059	153	0.1613
451	FT	8	q	47752736	49643059	153	0.1613
451	FT	8	q	49643882	53452354	96	-0.3279
451	FT	8	q	49643882	53452354	96	-0.3279
451	FT	8	q	53454816	75262701	1033	0.0501
451	FT	8	q	53454816	75262701	1033	0.0501
451	FT	8	q	75263448	80577673	94	-0.3091
451	FT	8	q	75263448	80577673	94	-0.3091
451	FT	8	q	80677403	110703421	1553	0.1162
451	FT	8	q	80677403	110703421	1553	0.1162
451	FT	8	q	110980305	114627699	80	-0.3198
451	FT	8	q	110980305	114627699	80	-0.3198
451	FT	8	q	116426256	144241523	1401	0.1703
451	FT	8	q	116426256	144241523	1401	0.1703
451	FT	8	q	144295016	146279334	566	0.5496
451	FT	8	q	144295016	146279334	566	0.5496
451	FT	9	p	154731	32489335	1245	-0.2751
451	FT	9	p	154731	32489335	1245	-0.2751
451	FT	9	p	32491235	39140585	976	0.2616
451	FT	9	p	32491235	39140585	976	0.2616
451	FT	9	p	39176019	44175608	18	-0.3722
451	FT	9	p	39176019	44175608	18	-0.3722
451	FT	9	q	65602571	88430917	916	-0.5447
451	FT	9	q	65602571	88430917	916	-0.5447
451	FT	9	q	88437776	101594091	1140	-0.4018
451	FT	9	q	88437776	101594091	1140	-0.4018
451	FT	9	q	101597437	114365270	799	-0.5857
451	FT	9	q	101597437	114365270	799	-0.5857
451	FT	9	q	114366017	117783360	461	-0.393
451	FT	9	q	114366017	117783360	461	-0.393
451	FT	9	q	117786256	123007173	112	-0.8105
451	FT	9	q	117786256	123007173	112	-0.8105
451	FT	9	q	123151492	130145688	787	-0.3896
451	FT	9	q	123151492	130145688	787	-0.3896
451	FT	9	q	130147204	131105442	359	-0.1039
451	FT	9	q	130147204	131105442	359	-0.1039
451	FT	9	q	131107402	138774838	1524	-0.3314
451	FT	9	q	131107402	138774838	1524	-0.3314
451	FT	9	q	138798851	141071660	810	-0.1429
451	FT	9	q	138798851	141071660	810	-0.1429
451	FT	10	p	95123	6369836	447	0.2226
451	FT	10	p	95123	6369836	447	0.2226
451	FT	10	p	6370014	15412944	502	0.0446
451	FT	10	p	6370014	15412944	502	0.0446
451	FT	10	p	15559088	21414759	367	-0.2825
451	FT	10	p	15559088	21414759	367	-0.2825
451	FT	10	p	21435219	38740338	997	-0.0016
451	FT	10	p	21435219	38740338	997	-0.0016
451	FT	10	q	42379858	52466451	597	0.0951
451	FT	10	q	42379858	52466451	597	0.0951
451	FT	10	q	52502740	56423871	98	-0.3696
451	FT	10	q	52502740	56423871	98	-0.3696
451	FT	10	q	58117777	70519076	503	-0.0217
451	FT	10	q	58117777	70519076	503	-0.0217
451	FT	10	q	70520709	74127985	538	0.2482
451	FT	10	q	70520709	74127985	538	0.2482
451	FT	10	q	74135536	75206248	168	-0.0435
451	FT	10	q	74135536	75206248	168	-0.0435
451	FT	10	q	75208388	99030335	1869	0.2202
451	FT	10	q	75208388	99030335	1869	0.2202
451	FT	10	q	99052301	100221494	232	0.4768
451	FT	10	q	99052301	100221494	232	0.4768
451	FT	10	q	100242398	101914523	146	0.0943
451	FT	10	q	100242398	101914523	146	0.0943
451	FT	10	q	101915874	106118059	876	0.397
451	FT	10	q	101915874	106118059	876	0.397
451	FT	10	q	106121733	111440671	81	-0.1385
451	FT	10	q	106121733	111440671	81	-0.1385
451	FT	10	q	111624846	114889561	228	0.2769
451	FT	10	q	111624846	114889561	228	0.2769
451	FT	10	q	114900907	123239333	694	0.6509
451	FT	10	q	114900907	123239333	694	0.6509
451	FT	10	q	123241625	133747965	683	0.8409
451	FT	10	q	123241625	133747965	683	0.8409
451	FT	10	q	133748268	135473026	373	1.2982
451	FT	10	q	133748268	135473026	373	1.2982
451	FT	11	p	193052	862603	307	-0.1103
451	FT	11	p	193052	862603	307	-0.1103
451	FT	11	p	864401	4144516	675	-0.3085
451	FT	11	p	864401	4144516	675	-0.3085
451	FT	11	p	4147834	6191326	256	-0.9822
451	FT	11	p	4147834	6191326	256	-0.9822
451	FT	11	p	6220395	6704370	178	-0.4506
451	FT	11	p	6220395	6704370	178	-0.4506
451	FT	11	p	6735805	7439138	64	-1.0119
451	FT	11	p	6735805	7439138	64	-1.0119
451	FT	11	p	7441682	20414438	1385	-0.4725
451	FT	11	p	7441682	20414438	1385	-0.4725
451	FT	11	p	20417357	31824255	351	-0.7541
451	FT	11	p	20417357	31824255	351	-0.7541
451	FT	11	p	31827912	34113466	199	-0.4428
451	FT	11	p	31827912	34113466	199	-0.4428
451	FT	11	p	34118001	34460444	49	0.6622
451	FT	11	p	34118001	34460444	49	0.6622
451	FT	11	p	34470773	46405072	480	0.1749
451	FT	11	p	34470773	46405072	480	0.1749
451	FT	11	p	46406683	48188770	463	-0.4446
451	FT	11	p	46406683	48188770	463	-0.4446
451	FT	11	p	48238344	51527614	131	-0.9261
451	FT	11	p	48238344	51527614	131	-0.9261
451	FT	11	q	55035776	56805289	142	-1.2066
451	FT	11	q	55035776	56805289	142	-1.2066
451	FT	11	q	56949341	57573348	165	-0.2834
451	FT	11	q	56949341	57573348	165	-0.2834
451	FT	11	q	57573471	60500971	336	-0.7775
451	FT	11	q	57573471	60500971	336	-0.7775
451	FT	11	q	60504402	62677157	668	-0.1863
451	FT	11	q	60504402	62677157	668	-0.1863
451	FT	11	q	62677334	63233621	70	-0.7809
451	FT	11	q	62677334	63233621	70	-0.7809
451	FT	11	q	63233798	65389663	765	-0.1431
451	FT	11	q	63233798	65389663	765	-0.1431
451	FT	11	q	65390970	67810835	769	0.5045
451	FT	11	q	65390970	67810835	769	0.5045
451	FT	11	q	67810959	76905395	1225	0.3586
451	FT	11	q	67810959	76905395	1225	0.3586
451	FT	11	q	76908466	108722766	1666	0.1239
451	FT	11	q	76908466	108722766	1666	0.1239
451	FT	11	q	108722891	111405120	101	0.407
451	FT	11	q	108722891	111405120	101	0.407
451	FT	11	q	111407450	114312406	365	0.7037
451	FT	11	q	111407450	114312406	365	0.7037
451	FT	11	q	114314523	114578233	31	0.1358
451	FT	11	q	114314523	114578233	31	0.1358
451	FT	11	q	115040186	118023208	322	0.8384
451	FT	11	q	115040186	118023208	322	0.8384
451	FT	11	q	118037599	123601216	758	0.2884
451	FT	11	q	118037599	123601216	758	0.2884
451	FT	11	q	123624275	124440860	96	-0.2921
451	FT	11	q	123624275	124440860	96	-0.2921
451	FT	11	q	124441179	129061931	448	0.1507
451	FT	11	q	124441179	129061931	448	0.1507
451	FT	11	q	129245939	130343438	145	0.3932
451	FT	11	q	129245939	130343438	145	0.3932
451	FT	11	q	130542936	134856553	204	-0.3254
451	FT	11	q	130542936	134856553	204	-0.3254
451	FT	12	p	176061	2224449	288	0.4296
451	FT	12	p	176061	2224449	288	0.4296
451	FT	12	p	2229479	6128177	390	0.1242
451	FT	12	p	2229479	6128177	390	0.1242
451	FT	12	p	6128309	7343871	518	0.4992
451	FT	12	p	6128309	7343871	518	0.4992
451	FT	12	p	7344187	10037521	459	0.0799
451	FT	12	p	7344187	10037521	459	0.0799
451	FT	12	p	10041300	22611380	976	-0.1424
451	FT	12	p	10041300	22611380	976	-0.1424
451	FT	12	p	22612359	34182457	756	0.105
451	FT	12	p	22612359	34182457	756	0.105
451	FT	12	q	38710667	40791655	153	-0.1634
451	FT	12	q	38710667	40791655	153	-0.1634
451	FT	12	q	40793752	41365165	147	-0.4508
451	FT	12	q	40793752	41365165	147	-0.4508
451	FT	12	q	41374648	46321691	254	0.3264
451	FT	12	q	41374648	46321691	254	0.3264
451	FT	12	q	46325274	54853095	1863	0.692
451	FT	12	q	46325274	54853095	1863	0.692
451	FT	12	q	54854139	56030602	151	0.1783
451	FT	12	q	54854139	56030602	151	0.1783
451	FT	12	q	56075532	56661465	306	0.8224
451	FT	12	q	56075532	56661465	306	0.8224
451	FT	12	q	56662883	59313723	732	0.6451
451	FT	12	q	56662883	59313723	732	0.6451
451	FT	12	q	59917080	62148686	15	-0.2435
451	FT	12	q	59917080	62148686	15	-0.2435
451	FT	12	q	62261018	69962761	516	0.4442
451	FT	12	q	62261018	69962761	516	0.4442
451	FT	12	q	69964116	88420625	862	-0.0916
451	FT	12	q	69964116	88420625	862	-0.0916
451	FT	12	q	88422808	99837404	703	0.0453
451	FT	12	q	88422808	99837404	703	0.0453
451	FT	12	q	99898218	100219045	13	-0.9181
451	FT	12	q	99898218	100219045	13	-0.9181
451	FT	12	q	100377800	113269541	1758	-0.0536
451	FT	12	q	100377800	113269541	1758	-0.0536
451	FT	12	q	113274193	113515252	61	0.4536
451	FT	12	q	113274193	113515252	61	0.4536
451	FT	12	q	113515840	113707549	72	1.1297
451	FT	12	q	113515840	113707549	72	1.1297
451	FT	12	q	113710360	118582670	328	0.745
451	FT	12	q	113710360	118582670	328	0.745
451	FT	12	q	118588828	120031678	83	0.3784
451	FT	12	q	118588828	120031678	83	0.3784
451	FT	12	q	120067566	122864856	587	0.8841
451	FT	12	q	120067566	122864856	587	0.8841
451	FT	12	q	122958050	131620562	747	0.0379
451	FT	12	q	122958050	131620562	747	0.0379
451	FT	12	q	131621443	133463780	333	0.254
451	FT	12	q	131621443	133463780	333	0.254
451	FT	12	q	133501915	133810733	40	-0.2686
451	FT	12	q	133501915	133810733	40	-0.2686
451	FT	13	q	19600475	25440180	433	-0.0848
451	FT	13	q	19600475	25440180	433	-0.0848
451	FT	13	q	25442694	44462886	1250	-0.274
451	FT	13	q	25442694	44462886	1250	-0.274
451	FT	13	q	44464263	46585516	143	0.2099
451	FT	13	q	44464263	46585516	143	0.2099
451	FT	13	q	46594483	101322476	1526	-0.1146
[truncated: 13,770 more rows]
