# Supplementary material for: Genomics of Ovarian Cancer Progression Reveals Diverse Metastatic Trajectories Including Intraepithelial Metastasis to the Fallopian Tube
Source: Oxford University Press journal article supplement (doi:10.1158/2159-8290.cd-16-0607), 2016-10-07
Supplement: 21598290cd160607-sup-167162_2_supp_3684206_xx8dxh.xlsx [file 21598290cd160607-sup-167162_2_supp_3684206_xx8dxh.xlsx]

## Sheet: Sheet1
Patient	Newick Tree	Newick with Bootstrap Values	Cophenetic Correlation Coefficient
442	((STIC:0.436,(FT:0.414,(OV:0.380,OM:0.380):0.033):0.023):0.064,gDNA:0.500);	((STIC:0.436,(FT:0.414,(OV:0.380,OM:0.380)100:0.033)97:0.023):0.064,gDNA:0.500);	0.981
451	(((STIC:0.429,FT:0.429):0.026,(OV:0.179,OM:0.179):0.276):0.045,gDNA:0.500);	(((STIC:0.429,FT:0.429)100:0.026,(OV:0.179,OM:0.179)100:0.276):0.045,gDNA:0.500);	0.999
505	(((STIC:0.286,OV:0.286):0.042,(FT:0.317,OM:0.317):0.010):0.173,gDNA:0.500);	(((STIC:0.286,OV:0.286)100:0.042,(FT:0.317,OM:0.317)75:0.010):0.173,gDNA:0.500);	0.996
530	((STIC:0.371,((FT:0.289,OM:0.289):0.070,OV:0.358):0.013):0.129,gDNA:0.500);	((STIC:0.371,((FT:0.289,OM:0.289)100:0.070,OV:0.358)74:0.013):0.129,gDNA:0.500);	0.994
539	((STIC:0.420,(FT:0.364,(OV:0.326,OM:0.326):0.038):0.056):0.080,gDNA:0.500);	((STIC:0.420,(FT:0.364,(OV:0.326,OM:0.326)100:0.038)100:0.056):0.080,gDNA:0.500);	0.998
559	((((STIC:0.303,FT:0.303):0.027,OV:0.330):0.056,OM:0.386):0.114,gDNA:0.500);	((((STIC:0.303,FT:0.303)100:0.027,OV:0.330)100:0.056,OM:0.386):0.114,gDNA:0.500);	0.994
563	(((STIC:0.336,(FT:0.245,OV:0.245):0.092):0.047,OM:0.384):0.116,gDNA:0.500);	(((STIC:0.336,(FT:0.245,OV:0.245)100:0.092)100:0.047,OM:0.384):0.116,gDNA:0.500);	0.999
754	((STIC:0.400,((FT:0.283,OM:0.283):0.023,OV:0.305):0.095):0.100,gDNA:0.500);	((STIC:0.400,((FT:0.283,OM:0.283)100:0.023,OV:0.305)100:0.095):0.100,gDNA:0.500);	0.999
